# Supplementary material for: From neurotoxicity to neuroprotection: Rethinking GABAAR-targeting anesthetics
Source: Springer Nature journal article supplement (doi:10.1007/s10565-025-10057-z), 2025-06-14
Supplement: MOESM1 [file 10565_2025_10057_MOESM1_ESM.pdf]

20250528222701112523091301041766

# From Neurotoxicity to Neuroprotection: Rethinking GABA<sub>A</sub>R-

## Targeting Anesthetics

Yubao Li<sup>1,2</sup>, Hongliang Yang<sup>1,2</sup>, Lu Liu<sup>2,3</sup>, Lulu Jiang<sup>2</sup>, Peilin Xie<sup>2</sup>, Xiaoling Wang<sup>2,3</sup>, Xuhui Cong<sup>2</sup>,  
Ruilou Zhu<sup>2</sup>, Zhongyuan Lu<sup>2,3</sup>, Mingyang Sun<sup>2\*</sup>, Jiaqiang Zhang<sup>2,4\*</sup>

<sup>1</sup>Xinxiang Medical University, Xinxiang, Henan, China.

<sup>2</sup>Department of Anesthesiology and Perioperative Medicine, Zhengzhou University People's Hospital  
and Henan provincial People's Hospital, Zhengzhou, Henan, China.

<sup>3</sup>Academy of Medical Science, Zhengzhou University, Zhengzhou, Henan, China.

<sup>4</sup>Institute of Electrophysiology, Henan Academy of Innovations in Medical Science, Zhengzhou, China

\*Correspondence author

Jiaqiang Zhang and Mingyang Sun

Department of Anesthesiology and Perioperative Medicine,

Zhengzhou University People's Hospital and Henan provincial People's Hospital,

Zhengzhou, P.R. China

Email to [zhangjiq@zzu.edu.cn](mailto:zhangjiq@zzu.edu.cn) (Jiaqiang Zhang) and also email to [znxyfs@zzu.edu.cn](mailto:znxyfs@zzu.edu.cn) (Mingyang Sun)

Telephone and fax numbers: +86 139-3712-1360, +86 5928 8887 777.

18 **ABSTRACT**

19 The brain growth spurt (BGS) represents a pivotal window in neurodevelopment, defined by rapid  
20 neurogenesis, heightened synaptogenesis, and the dynamic establishment of neural networks. During this  
21 phase, heightened brain plasticity significantly enhances learning and memory abilities, while also  
22 increasing the brain's susceptibility to disruptions. Anesthetics, particularly those targeting  $\gamma$ -  
23 aminobutyric acid type A receptors (GABA<sub>A</sub>Rs), interfere with GABAergic and glutamatergic systems,  
24 disrupt brain-derived neurotrophic factor (BDNF) signaling, and exacerbate neurotoxic effects. These  
25 agents activate glial cells, induce inflammation, and contribute to oxidative stress, while also disrupting  
26 calcium homeostasis and triggering endoplasmic reticulum stress. Furthermore, anesthetics alter the  
27 expression of non-coding RNAs, which affects gene regulation and long-term memory formation. The  
28 extent of neurotoxic effects is contingent upon a constellation of factors, including the timing, dosage,  
29 and frequency of anesthetic exposure, as well as individual susceptibility. Notably, perioperative  
30 administration of anesthetic agents has been implicated in long-term cognitive dysfunction, thereby  
31 emphasizing the critical importance of precisely modulated dosing regimens and temporally optimized  
32 delivery strategies to mitigate potential neurodevelopmental risks. In contrast, neuroactive steroids  
33 demonstrate promising neuroprotective potential by modulating GABA<sub>A</sub>R activity, enhancing BDNF  
34 release, and regulating oxidative stress and inflammation. New strategies for preventing and reversing  
35 anesthetic-induced neurotoxicity could include novel anesthetic combinations, anti-apoptotic agents,  
36 antioxidants, or nutritional supplements. These findings underscore the complex and multifactorial  
37 effects of anesthetic agents on the developing brain and emphasize the urgent need to establish and refine  
38 anesthetic strategies that safeguard neural integrity during vulnerable windows of neurodevelopment.  
39 **Keywords** Anesthetics Targeting GABAARs; Neurodevelopment; Neurotoxicity; Neuroprotective;  
40 Neuroactive Steroids

## 1. Introduction

A growing body of evidence derived from both animal models and clinical research suggests that the postnatal BGS represents a critical period in neurodevelopment, during which the central nervous system displays exceptional plasticity and heightened susceptibility to external perturbations. During this critical developmental window, neuronal circuits are sculpted through the rapid generation and remodeling of trillions of synapses, accompanied by dynamic neuronal migration, connectivity establishment, and functional maturation (Maksimovic et al., 2022). This crucial period is characterized by an accelerated process of neurogenesis, gliogenesis, and synaptogenesis, which collectively contribute to the brain's high plasticity and vulnerability (Fan et al., 2021; Vanderhaeghen & Polleux, 2023). At this developmental stage, the brain exhibits heightened sensitivity to disturbances arising from both environmental stimuli and pharmacological exposures.

An expanding corpus of evidence derived from both invertebrate and vertebrate models indicates that administration of general anesthetics during the BGS period can elicit extensive neurodevelopmental disruptions. These include the induction of neuronal apoptosis, inhibition of dendritic arborization, impairment of synaptogenesis, and disruption of synaptic plasticity, collectively contributing to persistent deficits in learning, memory, and long-term neurological function (Schaefer et al., 2019; Xu et al., 2018). It is now well-recognized that such adverse neurodevelopmental outcomes are mechanistically linked to the modulation of synaptic signaling by anesthetic agents. In particular, these drugs enhance inhibitory neurotransmission via GABA<sub>A</sub>Rs and/or suppress excitatory activity by antagonizing N-methyl-D-aspartate (NMDA) receptors—alterations that critically impair synaptic formation and stability during key developmental periods (Forcelli et al., 2011; Zhou et al., 2011). In clinical practice, GABA<sub>A</sub>R agonists are more commonly administered than NMDA receptor antagonists such as ketamine or nitrous oxide. Frequently utilized GABA<sub>A</sub>R-targeting anesthetics encompass inhalational agents—such as sevoflurane, isoflurane, and desflurane—as well as intravenous drugs including propofol, etomidate, and a range of benzodiazepines (e.g., midazolam, diazepam, remimazolam) and barbiturates (e.g., thiopental, pentobarbital).

GABA<sub>A</sub>R agonists such as propofol disrupt a critical developmental process in which GABA transitions from depolarizing to inhibitory action. By enhancing inhibitory signals, these agents disturb the balance between excitatory and inhibitory signaling, thereby compromising neural network stability and causing long-term damage to developing brain networks. Consequently, these drugs have been included on the FDA's warning list due to their potential neurotoxic risks to children (Food & Administration, 2017).

Neuroactive steroids (NAS), a subclass of endogenous steroid compounds, act as powerful allosteric modulators of GABA<sub>A</sub>Rs and play a pivotal role in modulating inhibitory neurotransmission within the central nervous system. While NAS agents such as CDNC, alphaxalone, and 3 $\beta$ -hydroxyandrostanes share sedative and anesthetic properties akin to propofol, they differ significantly in their neurotoxicity profiles. Notably, even at equivalent or supratherapeutic concentrations, these compounds do not elicit neuroapoptotic responses. In contrast, conventional anesthetics including isoflurane and propofol have



83 been shown to induce widespread neuronal apoptosis when administered during critical windows of brain  
84 development. These neurotoxic effects are intimately linked to enduring impairments in synaptogenesis,  
85 reduced neural plasticity, and cognitive decline (Xu et al., 2018; Zhao et al., 2023). Such findings  
86 underscore the distinctive neurodevelopmental safety profile of NAS agents relative to traditional  
87 anesthetics like propofol (Atluri et al., 2018; Tesic et al., 2020). Furthermore, NAS agents demonstrate  
88 more pronounced neuroprotective properties, such as preventing neuronal apoptosis, protecting against  
89 neurodegenerative diseases, and exerting anti-neuroinflammatory effects (Diviccaro et al., 2022).

90  
91 Given the divergent mechanisms of action and neurodevelopmental consequences observed  
92 between traditional intravenous anesthetics and emerging NAS, this review systematically examines the  
93 neurotoxic risks and neuroprotective potential of GABAergic intravenous anesthetics during early brain  
94 development. Particular attention is devoted to the reversibility and long-term consequences of  
95 developmental impairments resulting from anesthetic exposure. This discussion provides deeper insights  
96 into the molecular and cellular pathways implicated in anesthetic-induced neurotoxicity, while also  
97 exploring critical factors that modulate individual susceptibility to these adverse effects. Lastly, we  
98 evaluate emerging strategies aimed at preventing or attenuating anesthetic-related neurodevelopmental  
99 harm.

## 100 101 **2. Neurotoxic Mechanisms of Anesthetics Targeting GABA<sub>A</sub>Rs**

102  
103 During key stages of neurodevelopment, the precisely coordinated activity of GABAergic and  
104 glutamatergic signaling cascades is essential for orchestrating neural stem cell proliferation, directing  
105 lineage-specific differentiation, and ensuring neuronal survival and maturation. General anesthetics, by  
106 profoundly modulating these excitatory and inhibitory neurotransmitter systems, have been demonstrated  
107 to disrupt the finely tuned synaptic equilibrium essential for normal brain development during these  
108 sensitive periods. This dysregulation is partially mediated by alterations in the NKCC1/KCC2 expression  
109 ratio, which governs intracellular chloride gradients and GABAergic polarity (see section 2.1), as well  
110 through direct interference with the functional integrity of GABA<sub>A</sub>Rs and NMDA receptors (Cabrera  
111 et al., 2020). In addition, anesthetic agents have been reported to modulate the expression patterns of  
112 BDNF, a key neurotrophin involved in synaptic regulation, thereby influencing neuron–glia crosstalk  
113 and initiating downstream neuroinflammatory responses (Wan et al., 2021). Moreover, anesthetic agents  
114 influence the expression of brain-derived neurotrophic factor (BDNF), thereby modulating the functional  
115 dynamics of both neurons and glial cells, and eliciting neuroinflammatory responses. This leads to  
116 calcium overload, enhanced oxidative stress, mitochondrial damage, endoplasmic reticulum stress, and  
117 alterations in non-coding RNAs (ncRNAs). These interacting mechanisms impair the proper assembly  
118 of neural circuits during development and may exert enduring detrimental effects on overall brain  
119 function (Fig. 1).

### 120 121 **2.1 Disruption of Neurotransmitter Balance by Anesthetics**

122  
123 During early brain development, GABA is released prior to the functional maturation of  
124 glutamatergic synapses. In the neonatal cortex, high expression of the sodium–potassium–chloride  
125 cotransporter 1 (NKCC1) establishes a depolarizing chloride gradient, thereby rendering GABAergic

126 signaling excitatory during this critical developmental window. As the brain matures, the expression of  
 127 potassium–chloride cotransporter 2 (KCC2) progressively increases, replacing NKCC1 activity and  
 128 resulting in a developmental transition in GABA function—from excitatory to inhibitory. This dynamic  
 129 transition between excitatory and inhibitory signals ensures that neurons receive sufficient excitatory  
 130 inputs during development while progressively establishing inhibitory neural networks (Oh et al., 2016;  
 131 Watanabe & Fukuda, 2015). GABA<sub>A</sub>R agonists, such as propofol and etomidate, may disrupt the  
 132 excitation/inhibition (E/I) balance by increasing NKCC1 expression or inhibiting the maturation of  
 133 KCC2 (Ju et al., 2017). This disruption leads to chloride extrusion and membrane depolarization,  
 134 ultimately resulting in neuronal hyperexcitability and cognitive dysfunction (DiGruccio et al., 2015). In  
 135 addition to modulating neurotransmitter systems, general anesthetics have been shown to activate  
 136 voltage-gated calcium channels—particularly L-type channels—thereby elevating intracellular calcium  
 137 concentrations. This abnormal calcium influx disrupts neuronal calcium homeostasis, a fundamental  
 138 regulator of cell viability and intracellular signaling, and initiates a cascade of pathological events that  
 139 ultimately lead to neuronal degeneration. These observations underscore calcium dysregulation as a central  
 140 pathogenic mechanism in anesthetic-induced neurotoxicity (Miao et al., 2022; Schaefer et al., 2019;  
 141 Soyalp et al., 2022). BZDs like midazolam and diazepam enhance central GABAergic function by  
 142 binding to GABA<sub>A</sub>Rs and modulating downstream signaling pathways, including those involving protein  
 143 kinase G and synaptic marker interactions (Fredriksson et al., 2007; Jevtovic-Todorovic et al., 2003).  
 144 For instance, midazolam requires higher doses to induce sedation in neonatal animals because, at elevated  
 145 concentrations, the anesthetic's effect on KCC2 surpasses its impact on NKCC1, ultimately achieving  
 146 sedation through neuronal hyperpolarization (Doi et al., 2021). However, excessive dosages increase the  
 147 risk of neurotoxicity, particularly in infants, as anesthetic doses often exceed those used in adults,  
 148 rendering them more susceptible to neuronal injury. In contrast, remimazolam, with its lower equivalent  
 149 dosage, short half-life, and minimal accumulation, results in less memory impairment. This is attributed  
 150 to the reduced affinity of its metabolites for GABA<sub>A</sub>Rs, which is approximately 1/400 of remimazolam's  
 151 affinity, thereby decreasing NMDAR overexpression and alleviating synaptic damage (Shi et al., 2024).

153 During intense synaptic activation, Glutamate (GLU) induces postsynaptic membrane  
 154 depolarization by activating AMPA receptors, which relieves the magnesium block on NMDA receptors  
 155 and allows calcium ions to enter, triggering long-term potentiation (LTP). Subsequently, Postsynaptic  
 156 density protein 95 (PSD95) functions as a pivotal structural scaffold at the synapse, anchoring NMDA  
 157 AMPA receptors at the postsynaptic membrane, facilitating AMPA receptor insertion, and enabling  
 158 the induction of long-term potentiation (LTP) and synaptic plasticity, thereby strengthening synaptic  
 159 connectivity. Conversely, GABA<sub>A</sub>R activation has been shown to impair LTP induction—a fundamental  
 160 cellular mechanism underpinning learning and memory—by attenuating GLU release at excitatory  
 161 synapses. This inhibition of excitatory neurotransmission disrupts synaptic strengthening mechanisms  
 162 essential for cognitive development. In vitro experiments indicate that propofol inhibits GLU release by  
 163 suppressing presynaptic membrane depolarization, which reduces Na<sup>+</sup> influx while its effect on  
 164 presynaptic Ca<sup>2+</sup> influx and the reverse transport of transporters is not significant (Bademosi et al., 2018;  
 165 Karunanithi et al., 2020). Evidence from animal models indicates that propofol, at concentrations  
 166 consistent with clinical use, exerts direct modulatory effects on postsynaptic GABA<sub>A</sub>Rs, thereby  
 167 enhancing inhibitory neurotransmission during critical stages of brain development (Li et al., 2020). At  
 168 clinically relevant concentrations, both propofol and etomidate have been shown to interact with the

169 vesicle docking protein syntaxin1A, thereby restricting its lateral mobility and impairing glutamate  
170 (GLU) exocytosis from glutamatergic neurons in the basal forebrain of mice (Bademosi et al., 2018;  
171 Karunanithi et al., 2020). This molecular interaction diminishes neuronal excitability and contributes to  
172 functional impairment in cortical networks. Thiopental, another intravenous anesthetic, has been  
173 implicated in neonatal neurodegeneration by inhibiting GLU synthesis and promoting apoptotic signaling  
174 via upregulation of pro-apoptotic proteins (Naseri et al., 2017). Concurrently, gestational exposure to  
175 sevoflurane has been linked to sustained downregulation of key synaptic proteins—most notably PSD95  
176 and synaptophysin—in the hippocampus of both fetal and postnatal offspring, suggesting long-lasting  
177 impairments in synaptic architecture and integrity (Zheng et al., 2013). This effect may involve  
178 modulation of the ubiquitin–proteasome pathway. Impaired PSD95 expression destabilizes postsynaptic  
179 AMPA receptor anchoring, enhancing receptor internalization through clathrin-mediated endocytosis.  
180 These alterations compromise hippocampal synaptic potentiation and are associated with memory  
181 deficits in rodent behavioral paradigms (Liao et al., 2021; Lu et al., 2017).

## 182 183 2.2 Impact of Anesthetics on BDNF

184  
185 BDNF, a pivotal modulator of neurodevelopment, governs fundamental processes including  
186 neuronal differentiation, axonal and dendritic growth, and synaptic plasticity. Initially synthesized as the  
187 precursor protein proBDNF, BDNF is predominantly stored within synaptic vesicles and subsequently  
188 converted into its mature form (mBDNF) through proteolytic processing—a transformation essential for  
189 synaptic remodeling and the refinement of neural circuits during critical windows of brain development.  
190 Binding of proBDNF to its receptor p75<sup>NTR</sup> activates the RhoA signaling cascade, resulting in axonal  
191 elongation and growth cone collapse (Head et al., 2009). During neurodevelopment, BDNF regulates the  
192 development of GABAergic, glutamatergic, and other synaptic types to ensure the precise establishment  
193 and stability of neural networks in the brain (Szymanski & Minichiello, 2022).

194  
195 General anesthetics such as propofol significantly affect BDNF and its associated signaling  
196 pathways by modulating GABAergic and glutamatergic neurotransmission, thereby disrupting  
197 neuroplasticity (Cohen-Cory et al., 2010). Experimental studies have demonstrated that propofol  
198 attenuates the signaling cascade of BDNF and its receptor TrkB, thereby leading to reduced expression  
199 of PSD95 and impairing synaptic plasticity (Wan et al., 2021). Simultaneously, propofol activates the  
200 P75<sup>NTR</sup>/RhoA/ROCK pathway and GABA<sub>A</sub>Rs, increasing the ratio of proBDNF to mBDNF, disrupting  
201 the homeostasis of neurotrophic factor signaling, and exacerbating neuronal apoptosis, leading to  
202 neurological dysfunction (Kahraman et al., 2008). Furthermore, propofol significantly suppresses the  
203 expression of BDNF, B-cell lymphoma 2 (BCL-2), and phosphorylated cAMP response element-  
204 binding protein (p-CREB) in hippocampal neurons, thereby intensifying its neurotoxic impact (Wei  
205 et al., 2016).

206  
207 Within the context of early neural development, repeated exposure to sevoflurane disrupts the  
208 equilibrium between tissue plasminogen activator and its endogenous inhibitor PAI-1, thereby impairing  
209 the fibrinolytic cascade and compromising synaptic plasticity. This dysregulation subsequently hinders

the activation of TrkB signaling and reduces the proteolytic processing of proBDNF into mBDNF (Dong et al., 2020). In parallel, sevoflurane engages the proBDNF-p75 neurotrophin receptor (p75<sup>NTR</sup>) axis to trigger the JNK/c-JUN/AP-1 cascade (Bi et al., 2018), while simultaneously promoting neurodegenerative signaling via  $\beta$ -arrestin 1/2-mediated stimulation of metabotropic GLU receptors, leading to ERK1/2-MAPK activation and downstream NRF2/BACH1 transcriptional modulation (Wang et al., 2016; F. Yang et al., 2020). Disruption of the BDNF-TrkB-Pi3K-Akt-mTOR signalling cascade in both cortical and hippocampal circuits is increasingly recognised as a key contributor to the neurotoxic effects observed following exposure to general anaesthetics (Wang & Wang, 2019). In postnatal day 6 (P6) mice, exposure to sevoflurane induces pathological activation of GSK-3 $\beta$ , resulting in aberrant tau hyperphosphorylation, upregulation of IL-6 in the hippocampus, and diminished expression of the synaptic scaffolding protein PSD95. These molecular alterations converge to impair cognitive performance, suggesting a mechanistic link between anesthetic exposure, neuroinflammation, and synaptic dysfunction (Faraco et al., 2019; Tao et al., 2014).

Furthermore, Repeated exposure to benzodiazepines, including remimazolam and midazolam, has been demonstrated to disrupt short-term cognitive processes such as learning and memory in juvenile rodent models. This cognitive impairment may be mechanistically attributed to a reduction in BDNF, upregulated caspase-3 expression, diminished phosphorylation of PSD95, and suppression of LTP within the hippocampus, culminating in the exacerbation of hippocampal neuronal cell death. (Shi et al., 2024).

### 2.3 Effects of Anesthetics on Glial Cells and Inflammation

Anesthetic agents exert their effects not only on neurons but also extensively influence glial populations in the developing brain, with notable impacts on astrocytes, microglia, and oligodendrocytes. Amplified inflammatory activity within astrocytes and microglia is a defining feature of neuroinflammation, marked by glial cell activation or infiltration of immune cells that subsequently drive the upregulation of pro-inflammatory mediators (Mendiola & Cardona, 2018). Oligodendrocytes further influence neurodevelopment through their role in myelination (Fig. 3).

Microglial activation is broadly acknowledged as a central driver of pro-inflammatory cytokine and chemokine production within the central nervous system. Persistent or excessive activation of these immune mediators is intimately linked to neuronal injury and is thought to underlie anaesthesia-related neuroinflammatory pathologies (Chen et al., 2018). Repeated exposure to sevoflurane during the neonatal stage has been demonstrated to markedly stimulate microglial activation, leading to heightened expression of pivotal neuroinflammatory mediators such as TNF- $\alpha$ , IL-6, and IL-1 $\beta$  (M. Yang et al., 2020). Moreover, prenatal anaesthetic exposure via maternal administration disrupts fetal glial cell signaling, prominently increasing IL-6 production through extracellular signal-regulated kinase (ERK) phosphorylation (Hirotsu et al., 2019). Concurrently, neonatal exposure to sevoflurane significantly upregulates sirtuin 2 (SIRT2) in the hippocampus, promoting microglial polarization towards a pro-inflammatory M1 phenotype (Z. Wu, Y. Zhang, et al., 2020). Beyond inhalational anesthetics, intravenous agents such as propofol and midazolam have also been associated with microglial activation, leading to an upsurge in the release of inflammatory mediators, notably IL-1 $\beta$  and TNF- $\alpha$  (Popić et al., 2015; Ramirez et al., 2016). These responses contribute to neuroinflammatory cascades and interfere



with developmental neurogenesis (Milanovic et al., 2016). Exposure to propofol during early postnatal development significantly elevates the expression of pro-inflammatory markers—including caspase-1 and interleukin-1 $\beta$ —in both cortical and thalamic regions of postnatal day 7 (PND7) rats (Milanovic et al., 2016). Importantly, microglial activation induced by sevoflurane has likewise been linked to the pathogenesis of various neurodegenerative conditions (Yeh et al., 2017).

Astrocytes are essential regulators of neural circuit formation and play a fundamental role in sustaining synaptic architecture and functionality throughout neurodevelopment. Anesthetics may disrupt astrocyte density and function, thereby impairing BDNF secretion and indirectly affecting neuronal survival. For example, in high-density co-cultures of astrocytes, BDNF secretion effectively rescues propofol-induced neuronal death, whereas low-density astrocytes, which secrete insufficient BDNF, fail to provide the same protection (Y. Liu et al., 2017). These observations may offer mechanistic insight into the heightened susceptibility of the developing brain to anesthetic-induced neurotoxicity. Within the hippocampus, astrocytes enriched in phosphoprotein enriched in astrocytes 15 (PEA15) are prominently represented, with PEA15 expression shown to increase progressively as astrocytes undergo maturation... Mounting evidence indicates that propofol interferes with neurodevelopment by suppressing the expression of PEA15, thereby perturbing the ERK/CREB/RSK2 signaling axis. This disruption ultimately results in diminished neuronal proliferation alongside an increase in programmed cell death (Xian et al., 2019).

Oligodendrocytes are central mediators of myelin sheath formation, facilitating efficient axonal conduction and supporting the maturation of neural circuits (Choi et al., 2019; Thompson et al., 2020). Myelination, a tightly regulated and temporally coordinated process occurring during early postnatal development, plays a pivotal role in the emergence of higher-order cognitive capacities and is intimately associated with the dynamic remodeling of both structural and functional neural circuitry (Deoni et al., 2018). Oligodendrocytes are not fully mature during the neonatal period, and anesthetic-induced inflammation may permanently damage myelination, hindering normal neurodevelopment. Studies have shown that anesthetic drugs have a far greater impact on oligodendrocyte apoptosis than on neurons, with apoptosis occurring at twice the rate in oligodendrocytes, representing 59% of all apoptotic cells (Schenning et al., 2017). Administration of propofol during vulnerable windows of early neurodevelopment markedly amplifies apoptotic activity in both neuronal and oligodendrocyte populations, concurrently triggering a substantial upregulation of pro-inflammatory cytokine expression. These molecular and cellular disruptions exhibit a strong association with enduring behavioural impairments manifesting in later stages of life (Milanovic et al., 2016; Ye et al., 2013). Moreover, gestational exposure to sevoflurane has been shown to impair myelination in offspring by inducing iron deficiency, thereby compromising myelin structure and reducing overall myelin content (Zuo et al., 2020). Similarly, exposure to high concentrations of sevoflurane during the early postnatal phase has been linked to impaired oligodendrocyte maturation and disruption of the normal trajectory of white matter myelination in the developing rat brain. These disturbances in oligodendrocyte lineage development contribute to central nervous system dysmyelination, a pathological process that may underlie long-term cognitive impairments (Z. Wu, H. Xue, et al., 2020).

## 2.4 Effects of Anesthetics on Calcium Overload, Oxidative Stress, and Endoplasmic Reticulum Stress

Appropriate calcium ion ( $\text{Ca}^{2+}$ ) levels are crucial for regulating oxidative phosphorylation in the mitochondrial matrix, thereby maintaining normal ATP production rates. Nevertheless, excessive calcium influx—particularly originating from the cytosol or the endoplasmic reticulum (ER)—can compromise mitochondrial respiratory chain function, thereby promoting the overproduction of reactive oxygen species (ROS). The resulting elevation in intracellular ROS levels ultimately culminates in oxidative DNA damage (Piao et al., 2020). Excessive generation and accumulation of ROS compromise the structural integrity of the mitochondrial membrane, disrupt cellular energy homeostasis by impairing ATP synthesis, and increase mitochondrial outer membrane permeability (MOMP), collectively triggering signaling cascades that culminate in cellular dysfunction (Calvo-Rodriguez & Bacskaï, 2021; Marchi et al., 2018).

General anesthetics have been shown to induce excessive activation of inositol 1,4,5-trisphosphate ( $\text{IP}_3$ ) receptors, leading to a pronounced increase in cytosolic  $\text{Ca}^{2+}$  levels while simultaneously depleting calcium stores within the endoplasmic reticulum. This disruption in intracellular calcium homeostasis may represent a key mechanistic link underlying anesthesia-induced neurotoxicity during brain development (Yang & Wei, 2017). For instance, the combination of propofol and midazolam significantly increases mitochondrial ROS levels, inhibits antioxidant enzyme activity, and impairs synaptic function (Boscolo et al., 2013). Propofol uncouples oxidative phosphorylation, disrupting mitochondrial function and increasing ROS production, thereby exacerbating neurotoxicity, which is difficult to mitigate through pretreatment (Shibuta et al., 2022). When midazolam is combined with nitrous oxide and isoflurane, ROS levels increase by approximately 30%, and antioxidant enzyme activity is notably reduced (Boscolo et al., 2013). Anesthetic compounds—particularly benzodiazepines such as midazolam and diazepam—have been associated with detrimental neurodevelopmental consequences, primarily through the disruption of synaptic architecture, impairment of synaptic transmission, and induction of neuronal apoptosis (Lee et al., 2015).

Exposure to sevoflurane has been demonstrated to activate the PI3K/Akt signaling cascade, thereby perturbing the balance between pro-survival and pro-apoptotic pathways and triggering apoptotic cell death. This dysregulation enhances MOMP, ultimately triggering intrinsic apoptotic pathways and contributing to long-term cognitive impairments observed during adolescence (Hu et al., 2019; Yu et al., 2020). In parallel, mounting evidence implicates ER stress as a key mediator of sevoflurane-induced neurotoxicity, primarily via the PERK-eIF2 $\alpha$ -ATF4-CHOP signaling pathway (B. Liu et al., 2017). In the developing brain, exposure to sevoflurane has also been shown to upregulate the expression of protein tyrosine phosphatase 1B within the ER, thereby initiating ER stress responses and promoting neurodegenerative alterations (Liu et al., 2019).

## 2.5 Effects of Anesthetics Targeting GABA<sub>A</sub> Rs on Non-Coding RNAs (ncRNAs)

Emerging evidence highlights the pivotal influence of ncRNAs in orchestrating diverse neurobiological processes through intricate post-transcriptional regulatory mechanisms. General

anesthetics modulate the expression profiles of microRNAs (miRNAs) and long non-coding RNAs (lncRNAs) in the developing brain, forming complex molecular regulatory networks that may perturb critical neural pathways. Such dysregulation is implicated in the induction of acute neuronal apoptosis persistent memory deficits, potentially resulting in irreversible neurodevelopmental alterations (Jiang et al., 2021; Rodrigues et al., 2020; Shu et al., 2019).

With respect to apoptotic mechanisms, sevoflurane has been shown to upregulate the expression of caspase-3 and Bax, while concurrently downregulating Bcl-2, BDNF, and nerve growth factor (NGF). These changes are accompanied by alterations in long non-coding RNA (lncRNA) expression and a reduction in hippocampal neuronal density, collectively leading to ultrastructural abnormalities and neuronal apoptosis (Hu et al., 2019) (Hu et al., 2019). Moreover, the long non-coding RNA LRCF has been identified as a pivotal regulatory element in mediating isoflurane-induced apoptosis of oligodendrocytes. In neonatal mice, expression levels of LRCF are significantly elevated relative to those in adults. This upregulation promotes apoptotic signaling through activation of the HIF-1 $\alpha$ /caspase-3 axis. Conversely, reduced LRCF expression appears to exert neuroprotective effects by recruiting the alternative HIF-1 $\alpha$ /miR-138-5p/caspase-3 pathway. These expression-dependent regulatory divergences may account for the heightened susceptibility of the developing brain to anesthesia-induced neurotoxicity during the neonatal period. Consequently, high LRCF expression may serve as a high-risk biomarker for OLG damage caused by anesthesia (Zeng et al., 2021). Exposure to sevoflurane has been demonstrated to influence synaptic plasticity by upregulating the expression of synaptophysin mRNA, a key presynaptic marker, via a mechanism dependent on N6-methyladenosine RNA modification. Paradoxically, this post-transcriptional modification contributes to a subsequent decline in synaptophysin protein abundance, which is associated with disrupted motor coordination and impaired cognitive performance in juvenile mice (L. Zhang et al., 2022). Isoflurane anesthesia has been reported to downregulate the expression of microRNA-132, thereby reducing dendritic spine density in the hippocampus, a morphological alteration that contributes to impaired learning and memory performance in rodent models (Zhang et al., 2017).

### 3. Neuroprotective Potential of Anesthetics

NAS, as sedatives and anesthetics, demonstrate significant neuroprotective potential (Tateiwa & Evers, 2024). By modulating both inhibitory and excitatory neurotransmitter systems, NAS maintain the stability of neural networks. Additionally, NAS promote the release of BDNF, a molecule essential for supporting neuronal growth, viability, and synaptic plasticity. Furthermore, NAS regulate inflammation and oxidative stress, alleviating neuroinflammation and reducing oxidative damage, thereby effectively protecting neuronal cells from injury. These multiple mechanisms collectively highlight the potential of NAS agents as neurodevelopmental protective compounds (Fig. 3).

#### 3.1 Modulation of the Inhibitory Neurotransmitter System

While most NAS serve as potent allosteric modulators of GABA<sub>A</sub>R, enhancing or inhibiting GABA-induced currents via subtype-specific binding—such as potentiation by 3 $\alpha$ -hydroxylated neurosteroids and suppression by 3 $\beta$ -sulfated derivatives—emerging evidence indicates a divergence in neurotoxic potential among GABA<sub>A</sub>R-activating agents (Chen et al., 2019; Laverty et al., 2017). Notably,

compounds like propofol, CDNC24, and alphaxalone all activate GABA<sub>A</sub>Rs, yet only propofol has been consistently associated with significant neurotoxicity during brain development, whereas NAS such as alphaxalone exhibit negligible or no overt neurotoxic effects(Tesic et al., 2020). Further investigations revealed that NAS compounds, such as alphaxalone and 3 $\beta$ -OH, do not induce neuronal apoptosis, regardless of their activation of GABA<sub>A</sub>Rs. The neuroprotective properties of these compounds may be partially attributed to their ability to inhibit T-type calcium channels, particularly Cav3.1, thereby diminishing presynaptic GABA release(Tesic et al., 2020; Timic Stamenic et al., 2021). Intriguingly, the mechanism of action of 3 $\beta$ -OH appears to operate independently of classical modulation of GABAergic or NMDA receptor pathways(Atluri et al., 2018; Timic Stamenic et al., 2021). NAS enhances neuronal regeneration. For instance, allopregnanolone binds to the transmembrane domain of the GABA<sub>A</sub>R complex, activating the receptor and increasing intracellular Ca<sup>2+</sup> concentrations. This calcium influx subsequently activates CaMK IV, which phosphorylates and activates the transcription factor CREB1. Once activated, CREB1 enhances the transcription of genes involved in cell cycle regulation, thereby promoting mitotic activity in neural stem cells and oligodendrocyte precursor cells(G. F. Li et al., 2018). Moreover, NAS demonstrates significant potential for selective regulation of different GABA<sub>A</sub>R subtypes. These compounds can modulate receptor tonic currents by enhancing GABA<sub>A</sub>R-mediated current activity. At moderate concentrations, NAS compounds inhibit GABA<sub>A</sub>R function, whereas at lower and higher concentrations, they enhance GABA regulation. This suggests that NAS compounds exert a complex bidirectional effect on GABA<sub>A</sub>Rs within different concentration ranges, potentially providing a new therapeutic strategy for neuroprotection by modulating neural activity (Fig. 4).

400

### 401 3.2 Modulation of the Excitatory Neurotransmitter System

402

NAS, such as 3 $\beta$ -OH, reduces presynaptic AMPA receptor-mediated excitatory synaptic currents but does not affect NMDAR-mediated excitatory currents, thus modulating the glutamatergic system(Atluri et al., 2018). Gonadal steroids, such as estradiol (E2) and 17 $\beta$ -estradiol, potentiate NMDAR-mediated synaptic transmission and facilitate the release of GLU from primary afferent terminals, thereby increasing dendritic spine density in dorsal horn neurons of the spinal cord(Zhang et al., 2012). Estradiol not only enhances the binding of NMDAR agonists and competitive antagonists(Kow et al., 2005) but may also exert a dual action by enhancing cognitive function, promoting synaptic transmission while offering neuroprotective effects(Nilsen et al., 2002). The enantiomer of 17 $\beta$ -estradiol exhibits neuroprotective properties against glutamate-induced toxicity in cultured neuronal cells, implying that its protective effects may be mediated through pathways independent of classical nuclear estrogen receptors(Green et al., 2001). These studies suggest that NAS drugs exhibit neuroprotective potential by modulating NMDARs and the GLU transport system within a specific concentration range(Fig. 4).

416

### 417 3.3 Promotion of BDNF Release

418



Many studies have indicated that NAS can bind to and regulate various proteins involved in cell protection, including estrogen receptors  $\alpha/\beta$  (ER $\alpha/\beta$ ), the orphan nuclear receptor pregnane-X receptor (PXR), and the GPER1, thereby modulating BDNF levels (Briz & Baudry, 2014; Jakab et al., 2001; Serrao & Goodchild, 2022). For example, the enantiomer of 17 $\beta$ -estradiol regulates BDNF levels through an ER $\beta$ -mediated mechanism (Jakab et al., 2001). This modulatory action not only contributes to improved learning and memory performance but also serves a pivotal role in mitigating cognitive impairments induced by anesthesia (Taylor et al., 2017). Additionally, neurosteroid drugs such as alphaxalone activate PXR, further promoting the secretion of BDNF and exerting neuroprotective effects (Frye et al., 2014; Serrao & Goodchild, 2022). Clinical randomized controlled trials (RCTs) have demonstrated that patients treated with alphaxalone during hip replacement surgery show better cognitive performance postoperatively, with significantly higher plasma levels of BDNF than patients treated with propofol and sevoflurane (Serrao & Goodchild, 2022). These findings suggest that NAS, by modulating BDNF and associated pathways, exhibits significant neuroprotective effects, particularly in the recovery of cognitive function following anesthesia and surgery.

### 3.4 Regulation of Inflammation and Oxidative Stress

NAS, such as pregnenolone, exert anti-inflammatory effects through multiple signaling pathways, including Toll-like receptor signaling, the TRAM-TRIF pathway, BDNF, and CX3CL1 signaling pathways. NAS suppress the initiation of pro-inflammatory signaling cascades by disrupting the binding of Toll-like receptors—specifically TLR2, TLR4, and TLR7—to their adaptor proteins such as MyD88, MD2, and TIRAP, thereby reducing downstream synthesis of pro-inflammatory mediators (Balan et al., 2019; Balan, Grusca, et al., 2023; Balan, Patterson, et al., 2023). In addition to its established role in suppressing pro-inflammatory signaling, NAS activate the TLR4-TRAM-TRIF pathway, leading to the upregulation of key anti-inflammatory mediators such as IL-17 and BDNF, thereby contributing to neuroprotection (Aurelian & Balan, 2019). NAS also promote the expression of the anti-inflammatory chemokine CX3CL1, which is essential for maintaining the equilibrium between pro- and anti-inflammatory responses within the central nervous system, ultimately alleviating neuroinflammation. Furthermore, NAS have been shown to attenuate microglial pro-inflammatory activation by engaging GABA<sub>A</sub>Rs and modulating the BDNF-TrkA/TrkB signaling cascade, while concurrently regulating the transcription of pro-inflammatory genes (Alexaki et al., 2018; S. Y. Wu et al., 2020). Beyond anti-inflammatory action, NAS support neuronal repair and regeneration through diverse neuroprotective mechanisms, offering potential therapeutic benefits in the context of neurodegenerative conditions and traumatic brain injury. Collectively, these findings underscore the central role of inflammation and oxidative stress in anesthetic-induced neurotoxicity. Importantly, NAS modulate antioxidant and anti-inflammatory processes not only through GABAergic pathways but also via alternative non-GABAergic mechanisms, highlighting their promise in mitigating the adverse neurodevelopmental effects associated with anesthetic exposure.

## 4. Susceptibility Factors for Anesthetic-Induced Neurotoxicity

### 4.1. Dose-, Time-, and Frequency-Dependent Effects of Anesthetics

Anesthetic-induced neurotoxicity demonstrates marked dependence on dose, exposure duration, and administration frequency. Evidence from both cellular and animal models indicates that anesthetic agents, such as propofol, may facilitate the differentiation of neural progenitor cells into neurons when administered at very low concentrations (Qiao et al., 2017). However, at subclinical or medium-to-high doses, these anesthetics inhibit neuronal proliferation, increase pro-inflammatory factor levels, and trigger widespread neuronal apoptosis, with the extent of apoptosis gradually increasing with higher doses (K. Chen et al., 2022; Han et al., 2015). Anesthetic neurotoxicity also demonstrates a clear time dependence, with neuronal apoptosis worsening as the exposure duration increases (Huang et al., 2012; Zhang et al., 2016). In rodent models, brief exposure to propofol (2 or 4 hours) induced marked activation of caspase-3, a key executor of apoptosis. Notably, a more prolonged exposure of 6 hours elicited not only a pronounced increase in caspase-3 but also elevated calpain activity within the cerebral cortex and thalamus. These molecular alterations were concomitant with the emergence of apoptotic neuron profiles, indicating that extended anesthetic exposure may potentiate neurodegenerative processes in specific brain regions (Milanovic et al., 2010). Prolonged exposure to sevoflurane impairs the maturation of neural circuits by inhibiting synaptogenesis and destabilizing dendritic spine development. This anesthetic disruption is further characterized by structural synaptic alterations, including increased expression of synaptic vesicle-related proteins, reduced density of apical dendritic spines, and ultrastructural disorganization within hippocampal synapses, which collectively contribute to cognitive deficits observed in juvenile rats (Yu et al., 2020). Moreover, a study comparing single-dose versus seven-dose administrations of propofol with the same total dose showed that rats exposed multiple times exhibited significant impairments in spatial learning and hippocampal function, suggesting that frequent exposures may have a more severe impact on neurological function than a single cumulative dose (Gao et al., 2014). Recurrent administration of sevoflurane during critical periods of cortical development has been implicated in long-term synaptic dysfunction, accompanied by structural synaptic anomalies and persistent cognitive deficits manifesting in adulthood (G. Li et al., 2019; Zhou et al., 2019).

#### 4.2 Synergistic Effects of Combined Anesthesia

Emerging evidence indicates that the combined administration of anesthetic agents may markedly potentiate neuronal apoptosis and disrupt hippocampal synaptic integrity, thereby impairing learning and memory through synergistic neurotoxic effects (Jevtovic-Todorovic et al., 2003). For instance, during critical windows of brain maturation, the combined administration of ketamine with thiopental or propofol significantly amplifies neuronal cell death in neonatal animals and results in enduring functional impairments in adulthood, whereas the administration of these agents individually tends to produce only modest neurodevelopmental effects (Fredriksson et al., 2007). The combined use of anesthetics such as isoflurane, midazolam, and nitric oxide (NO) in a "triple cocktail" may reduce synaptic density (Lunardi et al., 2010), destabilize mitochondria (Sanchez et al., 2011), and increase autophagic activity (Fredriksson et al., 2007), which could contribute to neurodegenerative changes. Combined exposure to midazolam and nitrous oxide perturbs the homeostasis of mitochondrial dynamics by dysregulating key modulators such as Mfn-2 and Drp-1. This imbalance leads to pronounced mitochondrial morphological alterations, compromised bioenergetic function, and subsequent impairments in neuronal integrity and performance (Boscolo et al., 2013).

### 4.3 Region-Specific Sensitivity to Anesthetics During Critical Periods of Brain Development

During BGS, exposure to anesthetic drugs can lead to widespread neuronal apoptosis and result in persistent behavioral deficits (Gentry et al., 2013). The temporal window of the BGS varies significantly across mammalian species. In rodents, this critical phase of neurodevelopment unfolds within the first two weeks following birth (Semple et al., 2013), whereas in rhesus macaques, it spans from gestational day 115 to approximately postnatal day 60 (Brambrink et al., 2012); and in humans, the growth spurts occur at varying times across different brain regions, with most regions peaking in the second year after birth and typically reaching their maximum between 3 and 10 years of age (Andropoulos & Greene, 2017). Neuronal apoptosis induced by anesthetic drugs exhibits significant regional specificity at different time points during the BGS. In rodents, postnatal day 0 (P0) is the peak period of early apoptosis, primarily occurring in neurons of the hypothalamus and certain thalamic nuclei; day 3 (P3) marks the peak of intermediate apoptosis, affecting regions such as the Subiculum, Hilar, caudate nucleus, and thalamic nuclei; day 7 (P7) represents the peak of late apoptosis, predominantly affecting cortical neurons (Maloney et al., 2019). Similarly, In a comparable model using rhesus monkeys, prenatal exposure to propofol predominantly induces apoptosis in neurons and oligodendrocytes within the cerebellum, hypothalamus, and additional posterior and anterior brain regions, whereas exposure during the neonatal period primarily affects the cerebral cortex (Creeley et al., 2013) (Fig. 4).

### 4.4 Vulnerable Populations for Anesthetic-Induced Neurotoxicity

Neonates—particularly those born prematurely, with low birth weight, reduced gestational age, or complex congenital anomalies—constitute a highly vulnerable population, exhibiting an elevated susceptibility to anesthesia-related neurodevelopmental impairment. Neuroimaging studies have revealed that preterm infants frequently display structural abnormalities in both gray and white matter following neonatal surgery. These alterations, detectable by MRI, have been strongly correlated with subsequent cognitive deficits and delays in neurodevelopmental milestones (Filan et al., 2012; Stolwijk et al., 2017). Weiss et al. noted that neonatal brains are highly sensitive to ischemic injury, placing these groups at a higher risk for neurodevelopmental disorders during the perioperative period. Specifically, during anesthesia, changes in hemodynamics, respiration, and metabolism may have a greater impact on neurodevelopment than the anesthetic drugs themselves (Weiss et al., 2016). Furthermore, factors such as increased surgical frequency, prolonged hospital stays, and prolonged respiratory support further exacerbate the risk of neurodevelopmental disorders. These impairments are not only related to the direct effects of surgery and anesthesia, but may also be closely associated with hemodynamic instability, improper respiratory control, and metabolic imbalance during anesthesia, compounded by surgical stress and primary diseases (Stolwijk et al., 2016).

## 5 Potential Strategies to Prevent and Reverse Neurotoxicity

### 5.1 Combination of Newer Anesthetic Agents

Dexmedetomidine (DEX), a highly selective  $\alpha_2$ -adrenergic receptor agonist, has emerged as a potent neuroprotective agent against isoflurane-induced neurotoxicity, primarily due to its robust anti-apoptotic

properties. Mechanistically, DEX exerts its neuroprotective effects through engagement with several converging molecular cascades. These include the DNMT3a-miR-377-5p-Arc axis and the ERK1/2-CREB-BDNF signaling pathway (Xiao et al., 2018), along with activation of the PI3K-Akt cascade. Concurrently, it inhibits pro-apoptotic processes by downregulating the GSK-3 $\beta$ -CRMP2 and CDK5-CRMP2 pathways (Z. Chen et al., 2022). Pretreatment with DEX has also been shown to counteract the isoflurane-mediated repression of neurotrophic mediators such as BDNF mRNA, phosphorylated ERK1/2, CREB, and BDNF protein, thereby preserving synaptic homeostasis under anesthetic-induced stress (Tu et al., 2019). Additional studies have confirmed that the suppression of the GSK-3 $\beta$ /CRMP2 and CDK5/CRMP2 pathways by DEX contributes to reduced neuronal apoptosis and cognitive decline in neonatal models (J. Li et al., 2019). Moreover, the neuroprotection afforded by DEX extends beyond apoptosis, encompassing antioxidative and anti-inflammatory actions that mitigate sevoflurane-induced cognitive impairments (Wang et al., 2015). In neonatal rats, DEX may also confer protection via modulation of glutamatergic transmission (Wang et al., 2019). Activation of  $\alpha_2$ -adrenergic receptors by DEX and related agonists like clonidine has additionally been found to attenuate tau hyperphosphorylation and its associated cognitive sequelae in neonatal mice exposed to sevoflurane (Sun et al., 2021). Notably, the neuroprotective efficacy of DEX in anesthetic regimens appears dose-dependent: at low concentrations, co-administration with sevoflurane enhances neuroprotection; however, higher doses paradoxically increase apoptosis and mortality, potentially due to reduced  $\alpha_2$  receptor selectivity and inadvertent  $\alpha_1$  receptor activation (Liu et al., 2016; Perez-Zoghbi et al., 2020) (Perez-Zoghbi et al., 2017) (Fig. 4).

Novel BZDs such as remimazolam, when combined with sevoflurane, significantly reduce the incidence of postoperative delirium, suggesting a neuroprotective potential that may be linked to reduced overall anesthetic exposure (Yang et al., 2022). The combined use of anesthetics might also protect the brain by balancing excitatory and inhibitory pathways. For example, midazolam could facilitate the reuptake of excess GLU via EAAT2 and enhance GABA<sub>A</sub>R activity, inhibiting the release of glutamate transporters, thereby effectively alleviating excitotoxicity caused by the upregulation of NMDAR NR1 subunits after ketamine withdrawal (Y. Li et al., 2018; Slikker et al., 2007). Moreover, NAS such as 17 $\beta$ -estradiol may enhance AKT phosphorylation, increase p-GSK-3 $\beta$  levels, and stimulate BDNF release (W. Li et al., 2019; Yang et al., 2022), effectively mitigating the apoptosis induced by combinations of triple cocktails (Lu et al., 2006) or ketamine (Li et al., 2014). Alphaxalone has been reported to mitigate the neurotoxic effects elicited by isoflurane exposure in neonatal rats, highlighting its potential as a neuroprotective agent during early brain development (Zhao et al., 2023).

## 5.2 Neuroprotective Agents

### 5.2.1 Anti-Apoptotic Agents

Neuronal apoptosis is a major mechanism of developmental neurotoxicity induced by GABA<sub>A</sub>R receptor agonists. Inhibiting apoptotic pathways may serve as a potential intervention. The histamine H<sub>3</sub> receptor antagonist Clobenpropit has been shown to activate the PI3K/Akt signaling cascade, thereby mitigating isoflurane-induced apoptotic injury in hippocampal neurons in vitro (He et al., 2018) (He et al., 2018). Complementarily, the TNF- $\alpha$  inhibitor Etanercept significantly reduced neuronal apoptosis in



the developing rat brain following isoflurane exposure (Chen et al., 2016) (Chen et al., 2016), suggesting a role for inflammatory modulation in anesthetic-induced neurotoxicity. In a separate study, Straiko and colleagues demonstrated that the co-administration of lithium with either ketamine or propofol did not significantly alter caspase-3 activation levels compared to control conditions, indicating a limited effect of lithium in modulating anesthetic-induced apoptosis via this pathway (Straiko et al., 2009). Moreover, erythropoietin (EPO) can partially reverse the decrease in BDNF and Bcl-2 levels caused by general anesthetics, thereby mitigating neuronal damage (Pellegrini et al., 2014).

### 5.2.2 Anti-Inflammatory Agents

Neuroinflammation has emerged as a critical mediator of anesthetic-induced neurotoxicity, making it a compelling target for therapeutic intervention. Recent findings indicate that edaravone confers neuroprotection against isoflurane-induced neuronal injury by attenuating inflammatory and apoptotic responses via activation of the mBDNF–TrkB–PI3K signaling axis (Yang et al., 2021). These beneficial effects have been validated across both in vitro neuronal culture systems and in vivo preclinical models, highlighting the therapeutic promise of neurotrophic pathway modulation in mitigating anesthesia-related neural damage. In parallel, doxycycline—a semi-synthetic tetracycline antibiotic—has demonstrated potent neuroprotective capabilities beyond its antimicrobial function. Through engagement of the PI3K/Akt pathway, doxycycline has been shown to exert significant anti-inflammatory and anti-apoptotic effects, supporting its candidacy as a therapeutic agent for inflammation-related neurodevelopmental pathologies (Möller et al., 2016).

### 5.2.3 Anti-Oxidative Stress Neuroprotective Agents

Recent advances in neuropharmacology underscore the neuroprotective potential of natural antioxidants against anesthesia-induced neurotoxicity. Melatonin, for instance, has been shown to activate the PKC $\alpha$ /Nrf2 signaling cascade, upregulate the anti-apoptotic protein Bcl-xL, suppress cytochrome c release, and inhibit mitochondrial-dependent apoptotic pathways. Through these mechanisms, melatonin markedly reduces neuronal apoptosis triggered by combined exposure to diazepam, nitrous oxide, and isoflurane, suggesting a protective role in anesthetic neurotoxicity (B. Li et al., 2018; Yon et al., 2006). Similarly, curcumin (Ji et al., 2015) and resveratrol (Tang et al., 2021), both known for their antioxidant properties, have been demonstrated to attenuate sevoflurane-induced oxidative stress by neutralizing ROS and suppressing associated inflammatory responses. Acetyl-L-carnitine (L-Ca), a mitochondria-targeted antioxidant, has been identified as neuroprotective in aging and neurodegenerative conditions (Robinson et al., 2019; Yan et al., 2014). Notably, co-administration of L-Ca with propofol has been reported to alleviate propofol-induced cytotoxicity in embryonic neural stem cells, primarily by reducing ROS production and downregulating oxidative stress-related signaling pathways (Liu et al., 2014). These findings highlight the promise of L-Ca as a potential adjunct in anesthetic protocols, particularly those involving agents with known oxidative liabilities.

### 5.2.4 Nutritional Supplements for Neuroprotection

Calcium homeostasis disruption is a key mechanism underlying anesthetic-induced neurotoxicity, involving mitochondrial dysfunction as well as damage to astrocytes and neurons. Emerging evidence indicates that stabilizing intracellular calcium dynamics may represent a promising strategy to counteract the neurodevelopmental toxicity associated with sevoflurane exposure (Zhu et al., 2024). Iron deficiency has been recognized as a pivotal determinant of impaired myelination within the central nervous system, exerting its most detrimental effects during the fetal period and early stages of postnatal development. Disruptions in iron homeostasis during these sensitive periods may compromise oligodendrocyte function and hinder the proper formation of myelin sheaths (Ward et al., 2014). Sevoflurane exposure has been implicated in disrupting myelin development during early brain maturation, potentially through mechanisms involving oligodendrocyte apoptosis, as well as deficiencies in iron and folate metabolism. Supplementing with iron and folate and inhibiting OL apoptosis could be effective preventive measures, although further research is needed.

These findings suggest that strategies aimed at preventing apoptosis and inflammation, reducing oxidative stress, and restoring calcium homeostasis and nutrient balance may offer promising interventions against sevoflurane-induced neurotoxicity (Fig. 3).

## 6. Concluding Remarks and Future Directions

During the BGS, the finely tuned interplay between the GABAergic and glutamatergic (GABA/GLU) systems is essential for proper neural development, with the developmental switch from NKCC1 to KCC2 transporters serving as a pivotal mechanism in establishing the balance between E/I signaling. Anesthetics, particularly intravenous agents targeting GABA<sub>A</sub>Rs, may disrupt this transition, thereby destabilizing neural networks (Cabrera et al., 2020). Additional mechanisms include the imbalance of the BDNF signaling pathway, oxidative stress responses, and inflammatory reactions, all of which exacerbate neurotoxicity. Compared with traditional anesthetics, newer agents such as NAS (Tesić et al., 2020; Timić Stamenić et al., 2021), remimazolam (Shi et al., 2024), and DEX (Wei et al., 2016) exhibit milder mechanisms of action, maintaining sufficient anesthetic effects while minimizing interference with the nervous system. However, our understanding remains limited regarding how novel NAS and similar compounds may modulate T-type calcium channels and selectively bind to specific sites on GABA<sub>A</sub>R, thereby facilitating endogenous regenerative processes in the brain and mitigating the neurotoxic effects of anesthetic agents. Further investigation is essential to elucidate their potential in alleviating neurotoxicity. Concurrently, significant strides are being made in the development of neuroprotective pharmacotherapies. Agents such as melatonin (B. Li et al., 2018), erythropoietin (EPO) (Pellegrini et al., 2014), and resveratrol (Tang et al., 2021)—all of which exhibit potent antioxidant, anti-inflammatory, and neuroprotective properties—have been investigated as promising candidates for mitigating anesthetic-induced neurotoxicity (Fig. 3). Accordingly, the development of next-generation anesthetic agents should prioritise strategies that minimise neurotoxicity, enhance intrinsic neuroprotective mechanisms, and facilitate post-injury repair and functional recovery—thereby ensuring both the safety and therapeutic efficacy of anaesthesia in paediatric and other high-risk populations.

Since the 2016 advisory issued by the FDA regarding the potential neurotoxic effects of anesthetic agents in pediatric populations, there has been a marked increase in clinical investigations evaluating the

neurodevelopmental consequences of anesthetic exposure in children. Findings from key studies such as the PANDA study (Sun et al., 2016) and the GAS trial (Davidson et al., 2016; McCann et al., 2019) have shown that a single, brief exposure—typically under one hour—to general anesthesia in children younger than five years of age is not associated with significant long-term neurodevelopmental deficits. However, the MASK study provided evidence that multiple exposures prior to age three may be linked to slower cognitive processing, impaired fine motor coordination, and increased risk of behavioral and learning difficulties. Supporting this, recent data suggest that general anesthesia administered to infants under one year of age is associated with an elevated risk of developmental delays, with risk escalating as the number of surgical procedures increases (Kobayashi et al., 2020). While the majority of clinical studies suggest that isolated anesthetic exposure is relatively safe, the literature remains inconclusive due to ethical constraints, methodological limitations, and perioperative confounders. Notably, the combined neurotoxic effects of multiple anesthetic agents and their potential protective mechanisms remain underexplored. Future research should adopt an integrative approach, combining mechanistic molecular studies, behavioral analyses in animal models, and rigorously designed clinical trials. Prospective randomized controlled trials (RCTs) with long-term neurodevelopmental follow-up are essential. Moreover, the establishment of standardized dosing frameworks and exposure durations, alongside anesthesia protocols tailored to regional brain vulnerability across developmental stages, will be critical to advancing this field.

Clinical investigations into the long-term cognitive and behavioral consequences of anesthetic exposure in children employ heterogeneous methodologies. However, a significant proportion of these studies rely predominantly on subjective outcome assessments (Maloney et al., 2019), with limited incorporation of objective neuroimaging techniques or biomarker analyses, thereby straining a comprehensive evaluation of anesthetic-induced neurodevelopmental effects (Bethlehem et al., 2022; Hwang et al., 2022). Notably, quantitative ultrasound imaging has revealed increased apoptotic activity in the developing brains of non-human primates following sevoflurane exposure, highlighting the potential neurotoxic impact of this agent during vulnerable periods of brain maturation (Rosado-Mendez et al., 2019). Complementary neuroimaging studies suggest that pediatric exposure to inhalational anesthetics such as isoflurane and sevoflurane is associated with cognitive impairments and disruptions in white matter integrity (Banerjee et al., 2019; Bethlehem et al., 2022). Moreover, prospective investigations report that as many as 75% of infants undergoing non-cardiac surgery for congenital anomalies exhibit mild to moderate neuroimaging abnormalities postoperatively (Mongerson et al., 2019; Moran et al., 2019). To delineate the precise neurodevelopmental impact of anesthetic agents, future studies should adopt an integrative approach—combining MRI and diffusion tensor imaging (DTI) with high-resolution ultrasound and biomarker profiling (e.g., inflammatory cytokines, BDNF)—in conjunction with longitudinal assessments of cognitive and behavioral function across defined developmental windows. This will help establish preventive or reversal strategies, such as the use of antioxidants, calcium channel blockers, or agents that promote myelination, or through environmental stimulation and functional training to restore the function of impaired neural networks.

## 7. conclusion

718       With the widespread clinical application of intravenous anesthetics targeting GABA<sub>A</sub>Rs, their  
719 potential impact on the developing nervous system has increasingly become a focal point of academic  
720 attention. Although extensive research has elucidated the neurodevelopmental impact of GABA<sub>A</sub>R–  
721 targeting agents via modulation of both GABA<sub>A</sub>Rs and NMDA receptors, the specific influence of  
722 anesthetic drugs on synaptogenesis remains a complex and multilayered phenomenon. Deciphering the  
723 long-term consequences of such agents, alongside the identification of potential neuroprotective  
724 strategies and the refinement of their clinical applicability, continues to pose substantial challenges for  
725 future investigations.



726 **Statements & Declarations**

727

728 **Acknowledgements**

729 We sincerely thank all colleagues and collaborators whose insights and discussions contributed to the  
730 development of this manuscript. We are also grateful to the editorial office and anonymous reviewers for  
731 their constructive feedback, which helped us improve the clarity and rigor of our work.

732 **Funding**

733 This research was funded by the National Natural Science Foundation of China (82271288, 82471288).

734 **Conflict of interest**

735 The authors declare no competing interests.

736 **Contributors**

737 Yubao Li: Writing-review & editing, Writing-original draft, Conceptualization, Visualization.  
738 Hongliang Yang: Visualization, Investigation, Methodology, Validation. Lu Liu: Formal analysis,  
739 Investigation. Lulu Jiang: Methodology, Supervision. Peilin Xie: Supervision. Xiaoling Wang:  
740 Investigation. Xuhui Cong: Formal analysis. Ruilou Zhu: Project administration. Zhongyuan Lu: Project  
741 administration. Jiaqiang Zhang: Writing-review & editing, Supervision, Project administration, Funding  
742 acquisition, Investigation, Conceptualization, Resources. Mingyang Sun: Writing-review & editing,  
743 Supervision, Project administration, Funding acquisition, Investigation.

744 **Data availability**

745 No new datasets were generated or analyzed in the course of this review. As such, data sharing is not  
746 applicable.

747 **Ethical Approval**

748 This work is a synthesis of previously published literature and does not involve any original research  
749 involving human participants or animals conducted by the authors. All referenced studies received  
750 appropriate ethical approvals as documented in their respective publications.

751 **Sources and Data Illustration Strategy**

752 To illustrate the mechanisms of anesthetic-induced neurotoxicity, all pathway diagrams and synaptic  
753 models presented in this review were created using BioRender and manually curated from previously  
754 published peer-reviewed literature. No new experimental or clinical data were generated or analyzed  
755 for this work.

## References

- Alexaki, V. I., Fodelianaki, G., Neuwirth, A., Mund, C., Kourgiantaki, A., Ieronimaki, E., Lyroni, K., Troullinaki, M., Fujii, C., Kanczkowski, W., Ziogas, A., Peitzsch, M., Grossklaus, S., Sönnichsen, B., Gravanis, A., Bornstein, S. R., Charalampopoulos, I., Tsatsanis, C., & Chavakis, T. (2018). DHEA inhibits acute microglia-mediated inflammation through activation of the TrkA-Akt1/2-CREB-Jmjd3 pathway. *Mol Psychiatry*, 23(6), 1410-1420. <https://doi.org/10.1038/mp.2017.167>
- Andropoulos, D. B., & Greene, M. F. (2017). Anesthesia and Developing Brains - Implications of the FDA Warning. *N Engl J Med*, 376(10), 905-907. <https://doi.org/10.1056/NEJMp1700196>
- Atluri, N., Joksimovic, S. M., Oklopcic, A., Milanovic, D., Klawitter, J., Eggen, P., Krishnan, K., Covey, D. F., Todorovic, S. M., & Jevtovic-Todorovic, V. (2018). A neurosteroid analogue with T-type calcium channel blocking properties is an effective hypnotic, but is not harmful to neonatal rat brain. *Br J Anaesth*, 120(4), 768-778. <https://doi.org/10.1016/j.bja.2017.12.039>
- Aurelian, L., & Balan, I. (2019). GABA(A)R  $\alpha 2$ -activated neuroimmune signal controls binge drinking and impulsivity through regulation of the CCL2/CX3CL1 balance. *Psychopharmacology (Berl)*, 236(10), 3023-3043. <https://doi.org/10.1007/s00213-019-05220-4>
- Bademosi, A. T., Steeves, J., Karunanithi, S., Zalucki, O. H., Gormal, R. S., Liu, S., Lauwers, E., Verstreken, P., Anggono, V., Meunier, F. A., & van Swinderen, B. (2018). Trapping of Syntaxin1a in Presynaptic Nanoclusters by a Clinically Relevant General Anesthetic. *Cell Rep*, 22(2), 427-440. <https://doi.org/10.1016/j.celrep.2017.12.054>
- Balan, I., Beattie, M. C., O'Buckley, T. K., Aurelian, L., & Morrow, A. L. (2019). Endogenous Neurosteroid (3 $\alpha$ ,5 $\alpha$ )-3-Hydroxypregnan-20-one Inhibits Toll-like-4 Receptor Activation and Pro-inflammatory Signaling in Macrophages and Brain. *Sci Rep*, 9(1), 1220. <https://doi.org/10.1038/s41598-018-37409-6>
- Balan, I., Grusca, A., O'Buckley, T. K., & Morrow, A. L. (2023). Neurosteroid [3 $\alpha$ ,5 $\alpha$ ]-3-hydroxypregnan-20-one enhances IL-10 production via endosomal TRIF-dependent TLR4 signaling pathway. *Front Endocrinol (Lausanne)*, 14, 1299420. <https://doi.org/10.3389/fendo.2023.1299420>
- Balan, I., Patterson, R., Boero, G., Krohn, H., O'Buckley, T. K., Meltzer-Brody, S., & Morrow, A. L. (2023). Brexanolone therapeutics in post-partum depression involves inhibition of systemic inflammatory pathways. *EBioMedicine*, 89, 104473. <https://doi.org/10.1016/j.ebiom.2023.104473>
- Banerjee, P., Rossi, M. G., Angheliescu, D. L., Liu, W., Breazeale, A. M., Reddick, W. E., Glass, J. O., Phillips, N. S., Jacola, L. M., Sabin, N. D., Inaba, H., Srivastava, D., Robison, L. L., Pui, C. H., Hudson, M. M., & Krull, K. R. (2019). Association Between Anesthesia Exposure and Neurocognitive and Neuroimaging Outcomes in Long-term Survivors of Childhood Acute Lymphoblastic Leukemia. *JAMA Oncol*, 5(10), 1456-1463. <https://doi.org/10.1001/jamaoncol.2019.1094>
- Bethlehem, R. A. I., Seidlitz, J., White, S. R., Vogel, J. W., Anderson, K. M., Adamson, C., Adler, S., Alexopoulos, G. S., Anagnostou, E., Areces-Gonzalez, A., Astle, D. E., Auyeung, B., Ayub, M., Bae, J., Ball, G., Baron-Cohen, S., Beare, R., Bedford, S. A., Benegal, V.,...Alexander-Bloch, A. F.

798 (2022). Brain charts for the human lifespan. *Nature*, 604(7906), 525-533.  
799 <https://doi.org/10.1038/s41586-022-04554-y>

800 Bi, C., Cai, Q., Shan, Y., Yang, F., Sun, S., Wu, X., & Liu, H. (2018). Sevoflurane induces neurotoxicity in  
801 the developing rat hippocampus by upregulating connexin 43 via the JNK/c-Jun/AP-1  
802 pathway. *Biomed Pharmacother*, 108, 1469-1476.  
803 <https://doi.org/10.1016/j.biopha.2018.09.111>

804 Boscolo, A., Milanovic, D., Starr, J. A., Sanchez, V., Oklopčić, A., Moy, L., Ori, C. C., Erisir, A., & Jevtovic-  
805 Todorovic, V. (2013). Early exposure to general anesthesia disturbs mitochondrial fission and  
806 fusion in the developing rat brain. *Anesthesiology*, 118(5), 1086-1097.  
807 <https://doi.org/10.1097/ALN.0b013e318289bc9b>

808 Brambrink, A. M., Back, S. A., Riddle, A., Gong, X., Moravec, M. D., Dissen, G. A., Creeley, C. E.,  
809 Dikranian, K. T., & Olney, J. W. (2012). Isoflurane-induced apoptosis of oligodendrocytes in  
810 the neonatal primate brain. *Ann Neurol*, 72(4), 525-535. <https://doi.org/10.1002/ana.23652>

811 Briz, V., & Baudry, M. (2014). Estrogen Regulates Protein Synthesis and Actin Polymerization in  
812 Hippocampal Neurons through Different Molecular Mechanisms. *Front Endocrinol*  
813 *(Lausanne)*, 5, 22. <https://doi.org/10.3389/fendo.2014.00022>

814 Cabrera, O. H., Tesic, V., Tat, Q. L., Chastain, S., Quillinan, N., & Jevtovic-Todorovic, V. (2020).  
815 Sevoflurane-Induced Dysregulation of Cation-Chloride Cotransporters NKCC1 and KCC2 in  
816 Neonatal Mouse Brain. *Mol Neurobiol*, 57(1), 1-10. [https://doi.org/10.1007/s12035-019-](https://doi.org/10.1007/s12035-019-01751-1)  
817 [01751-1](https://doi.org/10.1007/s12035-019-01751-1)

818 Calvo-Rodriguez, M., & Bacskaí, B. J. (2021). Mitochondria and Calcium in Alzheimer's Disease: From  
819 Cell Signaling to Neuronal Cell Death. *Trends Neurosci*, 44(2), 136-151.  
820 <https://doi.org/10.1016/j.tins.2020.10.004>

821 Chen, B., Deng, X., Wang, B., & Liu, H. (2016). Etanercept, an inhibitor of TNF- $\alpha$ , prevents propofol-  
822 induced neurotoxicity in the developing brain. *Int J Dev Neurosci*, 55, 91-100.  
823 <https://doi.org/10.1016/j.ijdevneu.2016.10.002>

824 Chen, J., Zhang, D. M., Feng, X., Wang, J., Qin, Y. Y., Zhang, T., Huang, Q., Sheng, R., Chen, Z., Li, M., &  
825 Qin, Z. H. (2018). TIGAR inhibits ischemia/reperfusion-induced inflammatory response of  
826 astrocytes. *Neuropharmacology*, 131, 377-388.  
827 <https://doi.org/10.1016/j.neuropharm.2018.01.012>

828 Chen, K., Lu, D., Yang, X., Zhou, R., Lan, L., Wu, Y., Wang, C., Xu, X., Jiang, M. H., Wei, M., & Feng, X.  
829 (2022). Enhanced hippocampal neurogenesis mediated by PGC-1 $\alpha$ -activated OXPHOS after  
830 neonatal low-dose Propofol exposure. *Front Aging Neurosci*, 14, 925728.  
831 <https://doi.org/10.3389/fnagi.2022.925728>

832 Chen, Z., Ding, Y., Zeng, Y., Zhang, X. P., & Chen, J. Y. (2022). Dexmedetomidine reduces propofol-  
833 induced hippocampal neuron injury by modulating the miR-377-5p/Arc pathway. *BMC*  
834 *Pharmacol Toxicol*, 23(1), 18. <https://doi.org/10.1186/s40360-022-00555-9>

835 Chen, Z. W., Bracamontes, J. R., Budelier, M. M., Germann, A. L., Shin, D. J., Kathiresan, K., Qian, M. X.,  
836 Manion, B., Cheng, W. W. L., Reichert, D. E., Akk, G., Covey, D. F., & Evers, A. S. (2019).  
837 Multiple functional neurosteroid binding sites on GABAA receptors. *PLoS Biol*, 17(3),  
838 e3000157. <https://doi.org/10.1371/journal.pbio.3000157>

839 Choi, E. H., Blasiak, A., Lee, J., & Yang, I. H. (2019). Modulation of Neural Activity for Myelination in  
840 the Central Nervous System. *Front Neurosci*, 13, 952.  
841 <https://doi.org/10.3389/fnins.2019.00952>

842 Cohen-Cory, S., Kidane, A. H., Shirkey, N. J., & Marshak, S. (2010). Brain-derived neurotrophic factor  
843 and the development of structural neuronal connectivity. *Dev Neurobiol*, 70(5), 271-288.  
844 <https://doi.org/10.1002/dneu.20774>

845 Creeley, C., Dikranian, K., Dissen, G., Martin, L., Olney, J., & Brambrink, A. (2013). Propofol-induced  
846 apoptosis of neurones and oligodendrocytes in fetal and neonatal rhesus macaque brain. *Br J*  
847 *Anaesth*, 110 Suppl 1(Suppl 1), i29-38. <https://doi.org/10.1093/bja/aet173>

848 Davidson, A. J., Disma, N., de Graaff, J. C., Withington, D. E., Dorris, L., Bell, G., Stargatt, R., Bellinger,  
849 D. C., Schuster, T., Arnup, S. J., Hardy, P., Hunt, R. W., Takagi, M. J., Giribaldi, G., Hartmann, P.  
850 L., Salvo, I., Morton, N. S., von Ungern Sternberg, B. S., Locatelli, B. G.,...McCann, M. E.  
851 (2016). Neurodevelopmental outcome at 2 years of age after general anaesthesia and  
852 awake-regional anaesthesia in infancy (GAS): an international multicentre, randomised  
853 controlled trial. *Lancet*, 387(10015), 239-250. [https://doi.org/10.1016/s0140-6736\(15\)00608-](https://doi.org/10.1016/s0140-6736(15)00608-)  
854 [x](https://doi.org/10.1016/s0140-6736(15)00608-x)

855 Deoni, S., Dean, D., 3rd, Joelson, S., O'Regan, J., & Schneider, N. (2018). Early nutrition influences  
856 developmental myelination and cognition in infants and young children. *Neuroimage*, 178,  
857 649-659. <https://doi.org/10.1016/j.neuroimage.2017.12.056>

858 DiGruccio, M. R., Joksimovic, S., Joksovic, P. M., Lunardi, N., Salajegheh, R., Jevtovic-Todorovic, V.,  
859 Beenhakker, M. P., Goodkin, H. P., & Todorovic, S. M. (2015). Hyperexcitability of rat  
860 thalamocortical networks after exposure to general anesthesia during brain development. *J*  
861 *Neurosci*, 35(4), 1481-1492. <https://doi.org/10.1523/jneurosci.4883-13.2015>

862 Diviccaro, S., Cioffi, L., Falvo, E., Giatti, S., & Melcangi, R. C. (2022). Allopregnanolone: An overview on  
863 its synthesis and effects. *J Neuroendocrinol*, 34(2), e12996.  
864 <https://doi.org/10.1111/jne.12996>

865 Doi, A., Miyazaki, T., Mihara, T., Ikeda, M., Niikura, R., Andoh, T., & Goto, T. (2021). CLP290 promotes  
866 the sedative effects of midazolam in neonatal rats in a KCC2-dependent manner: A  
867 laboratory study in rats. *PLoS One*, 16(3), e0248113.  
868 <https://doi.org/10.1371/journal.pone.0248113>

869 Dong, Y., Hong, W., Tang, Z., Gao, Y., Wu, X., & Liu, H. (2020). Sevoflurane leads to learning and  
870 memory dysfunction via breaking the balance of tPA/PAI-1. *Neurochem Int*, 139, 104789.  
871 <https://doi.org/10.1016/j.neuint.2020.104789>

872 Fan, X. Y., Shi, G., & Zhao, P. (2021). Neonatal Sevoflurane Exposure Impairs Learning and Memory by  
873 the Hypermethylation of Hippocampal Synaptic Genes. *Mol Neurobiol*, 58(3), 895-904.  
874 <https://doi.org/10.1007/s12035-020-02161-4>

875 Faraco, G., Hochrainer, K., Segarra, S. G., Schaeffer, S., Santisteban, M. M., Menon, A., Jiang, H.,  
876 Holtzman, D. M., Anrather, J., & Iadecola, C. (2019). Dietary salt promotes cognitive  
877 impairment through tau phosphorylation. *Nature*, 574(7780), 686-690.  
878 <https://doi.org/10.1038/s41586-019-1688-z>

879 Filan, P. M., Hunt, R. W., Anderson, P. J., Doyle, L. W., & Inder, T. E. (2012). Neurologic outcomes in  
880 very preterm infants undergoing surgery. *J Pediatr*, 160(3), 409-414.  
881 <https://doi.org/10.1016/j.jpeds.2011.09.009>

882 Food, U., & Administration, D. (2017). FDA Drug Safety Communication: FDA review results in new  
 883 warnings about using general anesthetics and sedation drugs in young children and pregnant  
 884 women. *Silver Spring, MD, USA: US Food and Drug Administration*.

885 Forcelli, P. A., Kim, J., Kondratyev, A., & Gale, K. (2011). Pattern of antiepileptic drug-induced cell  
 886 death in limbic regions of the neonatal rat brain. *Epilepsia*, 52(12), e207-211.  
 887 <https://doi.org/10.1111/j.1528-1167.2011.03297.x>

888 Fredriksson, A., Pontén, E., Gordh, T., & Eriksson, P. (2007). Neonatal exposure to a combination of N-  
 889 methyl-D-aspartate and gamma-aminobutyric acid type A receptor anesthetic agents  
 890 potentiates apoptotic neurodegeneration and persistent behavioral deficits. *Anesthesiology*,  
 891 107(3), 427-436. <https://doi.org/10.1097/01.anes.0000278892.62305.9c>

892 Frye, C. A., Koonce, C. J., & Walf, A. A. (2014). Novel receptor targets for production and action of  
 893 allopregnanolone in the central nervous system: a focus on pregnane xenobiotic receptor.  
 894 *Front Cell Neurosci*, 8, 106. <https://doi.org/10.3389/fncel.2014.00106>

895 Gao, J., Peng, S., Xiang, S., Huang, J., & Chen, P. (2014). Repeated exposure to propofol impairs spatial  
 896 learning, inhibits LTP and reduces CaMKII $\alpha$  in young rats. *Neurosci Lett*, 560, 62-66.  
 897 <https://doi.org/10.1016/j.neulet.2013.11.061>

898 Gentry, K. R., Steele, L. M., Sedensky, M. M., & Morgan, P. G. (2013). Early developmental exposure to  
 899 volatile anesthetics causes behavioral defects in *Caenorhabditis elegans*. *Anesth Analg*,  
 900 116(1), 185-189. <https://doi.org/10.1213/ANE.0b013e31826d37c5>

901 Green, P. S., Yang, S. H., Nilsson, K. R., Kumar, A. S., Covey, D. F., & Simpkins, J. W. (2001). The  
 902 nonfeminizing enantiomer of 17 $\beta$ -estradiol exerts protective effects in neuronal cultures  
 903 and a rat model of cerebral ischemia. *Endocrinology*, 142(1), 400-406.  
 904 <https://doi.org/10.1210/endo.142.1.7888>

905 Han, D., Jin, J., Fang, H., & Xu, G. (2015). Long-term action of propofol on cognitive function and  
 906 hippocampal neuroapoptosis in neonatal rats. *Int J Clin Exp Med*, 8(7), 10696-10704.

907 He, W., Yuan, Q. H., & Zhou, Q. (2018). Histamine H3 receptor antagonist Clobenpropit protects  
 908 propofol-induced apoptosis of hippocampal neurons through PI3K/AKT pathway. *Eur Rev*  
 909 *Med Pharmacol Sci*, 22(22), 8013-8020. [https://doi.org/10.26355/eurrev\\_201811\\_16430](https://doi.org/10.26355/eurrev_201811_16430)

910 Head, B. P., Patel, H. H., Niesman, I. R., Drummond, J. C., Roth, D. M., & Patel, P. M. (2009). Inhibition  
 911 of p75 neurotrophin receptor attenuates isoflurane-mediated neuronal apoptosis in the  
 912 neonatal central nervous system. *Anesthesiology*, 110(4), 813-825.  
 913 <https://doi.org/10.1097/ALN.0b013e31819b602b>

914 Hirotsu, A., Iwata, Y., Tatsumi, K., Miyai, Y., Matsuyama, T., & Tanaka, T. (2019). Maternal exposure to  
 915 volatile anesthetics induces IL-6 in fetal brains and affects neuronal development. *Eur J*  
 916 *Pharmacol*, 863, 172682. <https://doi.org/10.1016/j.ejphar.2019.172682>

917 Hu, X., Hu, X., & Huang, G. (2019). LncRNA MALAT1 is involved in sevoflurane-induced neurotoxicity in  
 918 developing rats. *J Cell Biochem*, 120(10), 18209-18218. <https://doi.org/10.1002/jcb.29127>

919 Huang, L., Liu, Y., Jin, W., Ji, X., & Dong, Z. (2012). Ketamine potentiates hippocampal  
 920 neurodegeneration and persistent learning and memory impairment through the PKC $\gamma$ -ERK  
 921 signaling pathway in the developing brain. *Brain Res*, 1476, 164-171.  
 922 <https://doi.org/10.1016/j.brainres.2012.07.059>

923 Jakab, R. L., Wong, J. K., & Belcher, S. M. (2001). Estrogen receptor beta immunoreactivity in  
 924 differentiating cells of the developing rat cerebellum. *J Comp Neurol*, 430(3), 396-409.  
 925 [https://doi.org/10.1002/1096-9861\(20010212\)430:3<396::aid-cne1039>3.0.co;2-0](https://doi.org/10.1002/1096-9861(20010212)430:3<396::aid-cne1039>3.0.co;2-0)  
 926 Jevtovic-Todorovic, V., Hartman, R. E., Izumi, Y., Benshoff, N. D., Dikranian, K., Zorumski, C. F., Olney,  
 927 J. W., & Wozniak, D. F. (2003). Early exposure to common anesthetic agents causes  
 928 widespread neurodegeneration in the developing rat brain and persistent learning deficits. *J*  
 929 *Neurosci*, 23(3), 876-882. <https://doi.org/10.1523/jneurosci.23-03-00876.2003>  
 930 Ji, M. H., Qiu, L. L., Yang, J. J., Zhang, H., Sun, X. R., Zhu, S. H., Li, W. Y., & Yang, J. J. (2015). Pre-  
 931 administration of curcumin prevents neonatal sevoflurane exposure-induced  
 932 neurobehavioral abnormalities in mice. *Neurotoxicology*, 46, 155-164.  
 933 <https://doi.org/10.1016/j.neuro.2014.11.003>  
 934 Jiang, C., Arzuza, T., Yan, Y., & Bai, X. (2021). Expression Signature of lncRNAs and mRNAs in  
 935 Sevoflurane-Induced Mouse Brain Injury: Implication of Involvement of Wide Molecular  
 936 Networks and Pathways. *Int J Mol Sci*, 22(3). <https://doi.org/10.3390/ijms22031389>  
 937 Ju, L. S., Yang, J. J., Gravenstein, N., Seubert, C. N., Morey, T. E., Sumners, C., Vasilopoulos, T., Yang, J.  
 938 J., & Martynuk, A. E. (2017). Role of environmental stressors in determining the  
 939 developmental outcome of neonatal anesthesia. *Psychoneuroendocrinology*, 81, 96-104.  
 940 <https://doi.org/10.1016/j.psyneuen.2017.04.001>  
 941 Kahraman, S., Zup, S. L., McCarthy, M. M., & Fiskum, G. (2008). GABAergic mechanism of propofol  
 942 toxicity in immature neurons. *J Neurosurg Anesthesiol*, 20(4), 233-240.  
 943 <https://doi.org/10.1097/ANA.0b013e31817ec34d>  
 944 Karunanithi, S., Cylinder, D., Ertekin, D., Zalucki, O. H., Marin, L., Lavidis, N. A., Atwood, H. L., & van  
 945 Swinderen, B. (2020). Proportional Downscaling of Glutamatergic Release Sites by the  
 946 General Anesthetic Propofol at Drosophila Motor Nerve Terminals. *eNeuro*, 7(1).  
 947 <https://doi.org/10.1523/eneuro.0422-19.2020>  
 948 Kobayashi, Y., Tokuda, N., Adachi, S., Takeshima, Y., Hirose, M., & Shima, M. (2020). Association  
 949 between surgical procedures under general anesthesia in infancy and developmental  
 950 outcomes at 1 year: the Japan Environment and Children's Study. *Environ Health Prev Med*,  
 951 25(1), 32. <https://doi.org/10.1186/s12199-020-00873-6>  
 952 Kow, L. M., Easton, A., & Pfaff, D. W. (2005). Acute estrogen potentiates excitatory responses of  
 953 neurons in rat hypothalamic ventromedial nucleus. *Brain Res*, 1043(1-2), 124-131.  
 954 <https://doi.org/10.1016/j.brainres.2005.02.068>  
 955 Lavery, D., Thomas, P., Field, M., Andersen, O. J., Gold, M. G., Biggin, P. C., Gielen, M., & Smart, T. G.  
 956 (2017). Crystal structures of a GABA(A)-receptor chimera reveal new endogenous  
 957 neurosteroid-binding sites. *Nat Struct Mol Biol*, 24(11), 977-985.  
 958 <https://doi.org/10.1038/nsmb.3477>  
 959 Lee, J. H., Zhang, J., Wei, L., & Yu, S. P. (2015). Neurodevelopmental implications of the general  
 960 anesthesia in neonate and infants. *Exp Neurol*, 272, 50-60.  
 961 <https://doi.org/10.1016/j.expneurol.2015.03.028>  
 962 Li, B., Feng, X. J., Hu, X. Y., Chen, Y. P., Sha, J. C., Zhang, H. Y., & Fan, H. G. (2018). Effect of melatonin  
 963 on attenuating the isoflurane-induced oxidative damage is related to PKCα/Nrf2 signaling  
 964 pathway in developing rats. *Brain Res Bull*, 143, 9-18.  
 965 <https://doi.org/10.1016/j.brainresbull.2018.09.018>

966 Li, G., Du, J., Wang, L., & Shi, X. (2019). Developmental neurotoxicity in the context of multiple  
 967 sevoflurane exposures: Potential role of histone deacetylase 6. *Neurotoxicol Teratol*, 74,  
 968 106813. <https://doi.org/10.1016/j.ntt.2019.106813>  
 969 Li, G. F., Li, Z. B., Zhuang, S. J., & Li, G. C. (2018). Inhibition of microRNA-34a protects against propofol  
 970 anesthesia-induced neurotoxicity and cognitive dysfunction via the MAPK/ERK signaling  
 971 pathway. *Neuroscience Letters*, 675, 152-159.  
 972 <https://doi.org/https://doi.org/10.1016/j.neulet.2018.03.052>  
 973 Li, J., Guo, M., Liu, Y., Wu, G., Miao, L., Zhang, J., Zuo, Z., & Li, Y. (2019). Both GSK-3 $\beta$ /CRMP2 and  
 974 CDK5/CRMP2 Pathways Participate in the Protection of Dexmedetomidine Against Propofol-  
 975 Induced Learning and Memory Impairment in Neonatal Rats. *Toxicol Sci*, 171(1), 193-210.  
 976 <https://doi.org/10.1093/toxsci/kfz135>  
 977 Li, J., Wang, B., Wu, H., Yu, Y., Xue, G., & Hou, Y. (2014). 17 $\beta$ -estradiol attenuates ketamine-induced  
 978 neuroapoptosis and persistent cognitive deficits in the developing brain. *Brain Res*, 1593, 30-  
 979 39. <https://doi.org/10.1016/j.brainres.2014.09.013>  
 980 Li, W., Li, H., Wei, H., Lu, Y., Lei, S., Zheng, J., Lu, H., Chen, X., Liu, Y., & Zhang, P. (2019). 17 $\beta$ -Estradiol  
 981 Treatment Attenuates Neurogenesis Damage and Improves Behavior Performance After  
 982 Ketamine Exposure in Neonatal Rats. *Front Cell Neurosci*, 13, 251.  
 983 <https://doi.org/10.3389/fncel.2019.00251>  
 984 Li, Y., Chen, L., Zhu, D., Chen, Y., Qin, W., & Cui, J. (2020). Propofol downregulates the activity of  
 985 glutamatergic neurons in the basal forebrain via affecting intrinsic membrane properties and  
 986 postsynaptic GABAARs. *Neuroreport*, 31(17), 1242-1248.  
 987 <https://doi.org/10.1097/wnr.0000000000001540>  
 988 Li, Y., Li, X., Zhao, J., Li, L., Wang, Y., Zhang, Y., Chen, Y., Liu, W., & Gao, L. (2018). Midazolam  
 989 Attenuates Autophagy and Apoptosis Caused by Ketamine by Decreasing Reactive Oxygen  
 990 Species in the Hippocampus of Fetal Rats. *Neuroscience*, 388, 460-471.  
 991 <https://doi.org/10.1016/j.neuroscience.2018.03.040>  
 992 Liao, Z., Huang, Z., Li, J., Li, H., Miao, L., Liu, Y., Zhang, J., Xu, Y., & Li, Y. (2021). Regulation of CRMP2 by  
 993 Cdk5 and GSK-3 $\beta$  participates in sevoflurane-induced dendritic development abnormalities  
 994 and cognitive dysfunction in developing rats. *Toxicol Lett*, 341, 68-79.  
 995 <https://doi.org/10.1016/j.toxlet.2021.01.023>  
 996 Liu, B., Ou, G., Chen, Y., & Zhang, J. (2019). Inhibition of protein tyrosine phosphatase 1B protects  
 997 against sevoflurane-induced neurotoxicity mediated by ER stress in developing brain. *Brain*  
 998 *Res Bull*, 146, 28-39. <https://doi.org/10.1016/j.brainresbull.2018.12.006>  
 999 Liu, B., Xia, J., Chen, Y., & Zhang, J. (2017). Sevoflurane-Induced Endoplasmic Reticulum Stress  
 1000 Contributes to Neuroapoptosis and BACE-1 Expression in the Developing Brain: The Role of  
 1001 eIF2 $\alpha$ . *Neurotox Res*, 31(2), 218-229. <https://doi.org/10.1007/s12640-016-9671-z>  
 1002 Liu, F., Rainosek, S. W., Sadovova, N., Fogle, C. M., Patterson, T. A., Hanig, J. P., Paule, M. G., Slikker,  
 1003 W., Jr., & Wang, C. (2014). Protective effect of acetyl-L-carnitine on propofol-induced toxicity  
 1004 in embryonic neural stem cells. *Neurotoxicology*, 42, 49-57.  
 1005 <https://doi.org/10.1016/j.neuro.2014.03.011>  
 1006 Liu, J. R., Yuki, K., Baek, C., Han, X. H., & Soriano, S. G. (2016). Dexmedetomidine-Induced  
 1007 Neuroapoptosis Is Dependent on Its Cumulative Dose. *Anesth Analg*, 123(4), 1008-1017.  
 1008 <https://doi.org/10.1213/ane.0000000000001527>

1009 Liu, Y., Yan, Y., Inagaki, Y., Logan, S., Bosnjak, Z. J., & Bai, X. (2017). Insufficient Astrocyte-Derived  
 1010 Brain-Derived Neurotrophic Factor Contributes to Propofol-Induced Neuron Death Through  
 1011 Akt/Glycogen Synthase Kinase 3 $\beta$ /Mitochondrial Fission Pathway. *Anesth Analg*, 125(1), 241-  
 1012 254. <https://doi.org/10.1213/ane.0000000000002137>  
 1013 Lu, H., Liufu, N., Dong, Y., Xu, G., Zhang, Y., Shu, L., Soriano, S. G., Zheng, H., Yu, B., & Xie, Z. (2017).  
 1014 Sevoflurane Acts on Ubiquitination-Proteasome Pathway to Reduce Postsynaptic Density 95  
 1015 Protein Levels in Young Mice. *Anesthesiology*, 127(6), 961-975.  
 1016 <https://doi.org/10.1097/aln.0000000000001889>  
 1017 Lu, L. X., Yon, J. H., Carter, L. B., & Jevtovic-Todorovic, V. (2006). General anesthesia activates BDNF-  
 1018 dependent neuroapoptosis in the developing rat brain. *Apoptosis*, 11(9), 1603-1615.  
 1019 <https://doi.org/10.1007/s10495-006-8762-3>  
 1020 Lunardi, N., Ori, C., Erisir, A., & Jevtovic-Todorovic, V. (2010). General anesthesia causes long-lasting  
 1021 disturbances in the ultrastructural properties of developing synapses in young rats. *Neurotox*  
 1022 *Res*, 17(2), 179-188. <https://doi.org/10.1007/s12640-009-9088-z>  
 1023 Maksimovic, S., Useinovic, N., Quillinan, N., Covey, D. F., Todorovic, S. M., & Jevtovic-Todorovic, V.  
 1024 (2022). General Anesthesia and the Young Brain: The Importance of Novel Strategies with  
 1025 Alternate Mechanisms of Action. *Int J Mol Sci*, 23(3). <https://doi.org/10.3390/ijms23031889>  
 1026 Maloney, S. E., Creeley, C. E., Hartman, R. E., Yuede, C. M., Zorumski, C. F., Jevtovic-Todorovic, V.,  
 1027 Dikranian, K., Noguchi, K. K., Farber, N. B., & Wozniak, D. F. (2019). Using animal models to  
 1028 evaluate the functional consequences of anesthesia during early neurodevelopment.  
 1029 *Neurobiol Learn Mem*, 165, 106834. <https://doi.org/10.1016/j.nlm.2018.03.014>  
 1030 Marchi, S., Patergnani, S., Missiroli, S., Morciano, G., Rimessi, A., Wieckowski, M. R., Giorgi, C., &  
 1031 Pinton, P. (2018). Mitochondrial and endoplasmic reticulum calcium homeostasis and cell  
 1032 death. *Cell Calcium*, 69, 62-72. <https://doi.org/10.1016/j.ceca.2017.05.003>  
 1033 McCann, M. E., de Graaff, J. C., Dorris, L., Disma, N., Withington, D., Bell, G., Grobler, A., Stargatt, R.,  
 1034 Hunt, R. W., Sheppard, S. J., Marmor, J., Giribaldi, G., Bellinger, D. C., Hartmann, P. L., Hardy,  
 1035 P., Frawley, G., Izzo, F., von Ungern Sternberg, B. S., Lynn, A.,...Davidson, A. J. (2019).  
 1036 Neurodevelopmental outcome at 5 years of age after general anaesthesia or awake-regional  
 1037 anaesthesia in infancy (GAS): an international, multicentre, randomised, controlled  
 1038 equivalence trial. *Lancet*, 393(10172), 664-677. [https://doi.org/10.1016/s0140-](https://doi.org/10.1016/s0140-6736(18)32485-1)  
 1039 [6736\(18\)32485-1](https://doi.org/10.1016/s0140-6736(18)32485-1)  
 1040 Mendiola, A. S., & Cardona, A. E. (2018). The IL-1 $\beta$  phenomena in neuroinflammatory diseases. *J*  
 1041 *Neural Transm (Vienna)*, 125(5), 781-795. <https://doi.org/10.1007/s00702-017-1732-9>  
 1042 Miao, H. H., Liu, W. B., Jiao, X. H., Shao, K. J., Yuan, Y. X., Sha, S., Zhang, Q. Q., Yan, J., Sun, Y. Y., Zhou,  
 1043 C. H., & Wu, Y. Q. (2022). Neonatal Exposure to Propofol Interferes with the Proliferation and  
 1044 Differentiation of Hippocampal Neural Stem Cells and the Neurocognitive Function of Rats in  
 1045 Adulthood via the Akt/p27 Signaling Pathway. *Biomed Environ Sci*, 35(4), 283-295.  
 1046 <https://doi.org/10.3967/bes2022.040>  
 1047 Milanovic, D., Pesic, V., Loncarevic-Vasiljkovic, N., Pavkovic, Z., Popic, J., Kanazir, S., Jevtovic-  
 1048 Todorovic, V., & Ruzdijic, S. (2016). The Fas Ligand/Fas Death Receptor Pathways Contribute  
 1049 to Propofol-Induced Apoptosis and Neuroinflammation in the Brain of Neonatal Rats.  
 1050 *Neurotox Res*, 30(3), 434-452. <https://doi.org/10.1007/s12640-016-9629-1>



- 1051 Milanovic, D., Popic, J., Pesic, V., Loncarevic-Vasiljkovic, N., Kanazir, S., Jevtovic-Todorovic, V., &  
1052 Ruzdijic, S. (2010). Regional and temporal profiles of calpain and caspase-3 activities in  
1053 postnatal rat brain following repeated propofol administration. *Dev Neurosci*, 32(4), 288-301.  
1054 <https://doi.org/10.1159/000316970>
- 1055 Möller, T., Bard, F., Bhattacharya, A., Biber, K., Campbell, B., Dale, E., Eder, C., Gan, L., Garden, G. A.,  
1056 Hughes, Z. A., Pearse, D. D., Staal, R. G., Sayed, F. A., Wes, P. D., & Boddeke, H. W. (2016).  
1057 Critical data-based re-evaluation of minocycline as a putative specific microglia inhibitor.  
1058 *Glia*, 64(10), 1788-1794. <https://doi.org/10.1002/glia.23007>
- 1059 Mongerson, C. R. L., Wilcox, S. L., Goins, S. M., Pier, D. B., Zurakowski, D., Jennings, R. W., & Bajic, D.  
1060 (2019). Infant Brain Structural MRI Analysis in the Context of Thoracic Non-cardiac Surgery  
1061 and Critical Care. *Front Pediatr*, 7, 315. <https://doi.org/10.3389/fped.2019.00315>
- 1062 Moran, M. M., Gunn-Charlton, J. K., Walsh, J. M., Cheong, J. L. Y., Anderson, P. J., Doyle, L. W.,  
1063 Greaves, S., & Hunt, R. W. (2019). Associations of Neonatal Noncardiac Surgery with Brain  
1064 Structure and Neurodevelopment: A Prospective Case-Control Study. *J Pediatr*, 212, 93-  
1065 101.e102. <https://doi.org/10.1016/j.jpeds.2019.05.050>
- 1066 Naseri, M., Parham, A., & Moghimi, A. (2017). The effect of sodium thiopental as a GABA mimetic  
1067 drug in neonatal period on expression of GAD65 and GAD67 genes in hippocampus of  
1068 newborn and adult male rats. *Iran J Basic Med Sci*, 20(9), 996-1001.  
1069 <https://doi.org/10.22038/ijbms.2017.9264>
- 1070 Nilsen, J., Chen, S., & Brinton, R. D. (2002). Dual action of estrogen on glutamate-induced calcium  
1071 signaling: mechanisms requiring interaction between estrogen receptors and src/mitogen  
1072 activated protein kinase pathway. *Brain Res*, 930(1-2), 216-234.  
1073 [https://doi.org/10.1016/S0006-8993\(02\)02254-0](https://doi.org/10.1016/S0006-8993(02)02254-0)
- 1074 Oh, W. C., Lutz, S., Castillo, P. E., & Kwon, H. B. (2016). De novo synaptogenesis induced by GABA in  
1075 the developing mouse cortex. *Science*, 353(6303), 1037-1040.  
1076 <https://doi.org/10.1126/science.aaf5206>
- 1077 Pellegrini, L., Bennis, Y., Velly, L., Grandvuillemin, I., Pisano, P., Bruder, N., & Guillet, B. (2014).  
1078 Erythropoietin protects newborn rat against sevoflurane-induced neurotoxicity. *Paediatr*  
1079 *Anaesth*, 24(7), 749-759. <https://doi.org/10.1111/pan.12372>
- 1080 Perez-Zoghbi, J. F., Zhu, W., Grafe, M. R., & Brambrink, A. M. (2017). Dexmedetomidine-mediated  
1081 neuroprotection against sevoflurane-induced neurotoxicity extends to several brain regions  
1082 in neonatal rats. *Br J Anaesth*, 119(3), 506-516. <https://doi.org/10.1093/bja/aex222>
- 1083 Perez-Zoghbi, J. F., Zhu, W., Neudecker, V., Grafe, M. R., & Brambrink, A. M. (2020). Neurotoxicity of  
1084 sub-anesthetic doses of sevoflurane and dexmedetomidine co-administration in neonatal  
1085 rats. *Neurotoxicology*, 79, 75-83. <https://doi.org/10.1016/j.neuro.2020.03.014>
- 1086 Piao, M., Wang, Y., Liu, N., Wang, X., Chen, R., Qin, J., Ge, P., & Feng, C. (2020). Sevoflurane Exposure  
1087 Induces Neuronal Cell Parthanatos Initiated by DNA Damage in the Developing Brain via an  
1088 Increase of Intracellular Reactive Oxygen Species. *Front Cell Neurosci*, 14, 583782.  
1089 <https://doi.org/10.3389/fncel.2020.583782>
- 1090 Popić, J., Pešić, V., Milanović, D., Lončarević-Vasiljković, N., Smiljanić, K., Kanazir, S., & Ruždijić, S.  
1091 (2015). Induction of TNF- $\alpha$  signaling cascade in neonatal rat brain during propofol anesthesia.  
1092 *Int J Dev Neurosci*, 44, 22-32. <https://doi.org/10.1016/j.ijdevneu.2015.05.003>

1093 Qiao, H., Li, Y., Xu, Z., Li, W., Fu, Z., Wang, Y., King, A., & Wei, H. (2017). Propofol Affects  
 1094 Neurodegeneration and Neurogenesis by Regulation of Autophagy via Effects on Intracellular  
 1095 Calcium Homeostasis. *Anesthesiology*, 127(3), 490-501.  
 1096 <https://doi.org/10.1097/aln.0000000000001730>  
 1097 Ramirez, K., Niraula, A., & Sheridan, J. F. (2016). GABAergic modulation with classical benzodiazepines  
 1098 prevent stress-induced neuro-immune dysregulation and behavioral alterations. *Brain Behav*  
 1099 *Immun*, 51, 154-168. <https://doi.org/10.1016/j.bbi.2015.08.011>  
 1100 Robinson, B., Gu, Q., Ali, S. F., Dumas, M., & Kanungo, J. (2019). Ketamine-induced attenuation of  
 1101 reactive oxygen species in zebrafish is prevented by acetyl L-carnitine in vivo. *Neurosci Lett*,  
 1102 706, 36-42. <https://doi.org/10.1016/j.neulet.2019.05.009>  
 1103 Rodrigues, D. C., Muftuev, M., Weatheritt, R. J., Djuric, U., Ha, K. C. H., Ross, P. J., Wei, W., Piekna, A.,  
 1104 Sartori, M. A., Byres, L., Mok, R. S. F., Zaslavsky, K., Pasceri, P., Diamandis, P., Morris, Q.,  
 1105 Blencowe, B. J., & Ellis, J. (2020). Shifts in Ribosome Engagement Impact Key Gene Sets in  
 1106 Neurodevelopment and Ubiquitination in Rett Syndrome. *Cell Rep*, 30(12), 4179-4196.e4111.  
 1107 <https://doi.org/10.1016/j.celrep.2020.02.107>  
 1108 Rosado-Mendez, I. M., Noguchi, K. K., Castañeda-Martinez, L., Kirvassilis, G., Wang, S. H., Manzella, F.,  
 1109 Swiney, B. S., Masuoka, K., Capuano, S., III, Brunner, K. G., Crosno, K., Guerrero, Q. W.,  
 1110 Whitson, H., Brambrink, A., Simmons, H. S., Mejia, A. F., Zagzebski, J. A., Hall, T. J., &  
 1111 Ikonomidou, C. (2019). Quantitative ultrasound and apoptotic death in the neonatal primate  
 1112 brain. *Neurobiol Dis*, 127, 554-562. <https://doi.org/10.1016/j.nbd.2019.03.032>  
 1113 Sanchez, V., Feinstein, S. D., Lunardi, N., Joksovic, P. M., Boscolo, A., Todorovic, S. M., & Jevtovic-  
 1114 Todorovic, V. (2011). General Anesthesia Causes Long-term Impairment of Mitochondrial  
 1115 Morphogenesis and Synaptic Transmission in Developing Rat Brain. *Anesthesiology*, 115(5),  
 1116 992-1002. <https://doi.org/10.1097/ALN.0b013e3182303a63>  
 1117 Schaefer, M. L., Wang, M., Perez, P. J., Coca Peralta, W., Xu, J., & Johns, R. A. (2019). Nitric Oxide  
 1118 Donor Prevents Neonatal Isoflurane-induced Impairments in Synaptic Plasticity and Memory.  
 1119 *Anesthesiology*, 130(2), 247-262. <https://doi.org/10.1097/aln.0000000000002529>  
 1120 Schenning, K. J., Noguchi, K. K., Martin, L. D., Manzella, F. M., Cabrera, O. H., Dissen, G. A., &  
 1121 Brambrink, A. M. (2017). Isoflurane exposure leads to apoptosis of neurons and  
 1122 oligodendrocytes in 20- and 40-day old rhesus macaques. *Neurotoxicol Teratol*, 60, 63-68.  
 1123 <https://doi.org/10.1016/j.ntt.2016.11.006>  
 1124 Semple, B. D., Blomgren, K., Gimlin, K., Ferriero, D. M., & Noble-Haeusslein, L. J. (2013). Brain  
 1125 development in rodents and humans: Identifying benchmarks of maturation and  
 1126 vulnerability to injury across species. *Prog Neurobiol*, 106-107, 1-16.  
 1127 <https://doi.org/10.1016/j.pneurobio.2013.04.001>  
 1128 Serrao, J. M., & Goodchild, C. S. (2022). Alfaxalone anaesthesia increases brain derived neurotrophic  
 1129 factor levels and preserves postoperative cognition by activating pregnane-X receptors: an in  
 1130 vitro study and a double blind randomised controlled trial. *BMC Anesthesiol*, 22(1), 401.  
 1131 <https://doi.org/10.1186/s12871-022-01940-x>  
 1132 Shi, W., Wu, X., Yuan, C., Kuang, T., Xie, X., Gong, W., Li, F., Shen, L., Zhang, Y., & Liang, X. (2024).  
 1133 Effect of remimazolam toluene sulfonate on the cognitive function of juveniles and its  
 1134 mechanism of action. *Eur J Med Res*, 29(1), 543. [https://doi.org/10.1186/s40001-024-02142-](https://doi.org/10.1186/s40001-024-02142-6)  
 1135 6

- 1136 Shibuta, S., Morita, T., & Kosaka, J. (2022). Effect of preconditioning on propofol-induced  
1137 neurotoxicity during the developmental period. *PLoS One*, 17(8), e0273219.  
1138 <https://doi.org/10.1371/journal.pone.0273219>
- 1139 Shu, P., Wu, C., Liu, W., Ruan, X., Liu, C., Hou, L., Zeng, Y., Fu, H., Wang, M., Chen, P., Zhang, X., Yin, B.,  
1140 Yuan, J., Qiang, B., & Peng, X. (2019). The spatiotemporal expression pattern of microRNAs in  
1141 the developing mouse nervous system. *J Biol Chem*, 294(10), 3444-3453.  
1142 <https://doi.org/10.1074/jbc.RA118.004390>
- 1143 Slikker, W., Jr., Zou, X., Hotchkiss, C. E., Divine, R. L., Sadovova, N., Twaddle, N. C., Doerge, D. R.,  
1144 Scallet, A. C., Patterson, T. A., Hanig, J. P., Paule, M. G., & Wang, C. (2007). Ketamine-induced  
1145 neuronal cell death in the perinatal rhesus monkey. *Toxicol Sci*, 98(1), 145-158.  
1146 <https://doi.org/10.1093/toxsci/kfm084>
- 1147 Soyalp, C., Oksuz, E., Gorgisen, G., Gulacar, I. M., Yasar, S., Tuncdemir, Y. E., & Delen, L. A. (2022). Role  
1148 of Sedative-Hypnotic Agents in Neurodegeneration: Effects of Midazolam and Thiopental on  
1149 Apoptosis and Oxidative Stress Expression in Neonatal and Adult Rat Brains. *Turk Neurosurg*,  
1150 32(3), 378-385. <https://doi.org/10.5137/1019-5149.Jtn.32324-20.2>
- 1151 Stolwijk, L. J., Keunen, K., de Vries, L. S., Groenendaal, F., van der Zee, D. C., van Herwaarden, M. Y. A.,  
1152 Lemmers, P. M. A., & Benders, M. (2017). Neonatal Surgery for Noncardiac Congenital  
1153 Anomalies: Neonates at Risk of Brain Injury. *J Pediatr*, 182, 335-341.e331.  
1154 <https://doi.org/10.1016/j.jpeds.2016.11.080>
- 1155 Stolwijk, L. J., Lemmers, P. M., Harmsen, M., Groenendaal, F., de Vries, L. S., van der Zee, D. C.,  
1156 Benders, M. J., & van Herwaarden-Lindeboom, M. Y. (2016). Neurodevelopmental Outcomes  
1157 After Neonatal Surgery for Major Noncardiac Anomalies. *Pediatrics*, 137(2), e20151728.  
1158 <https://doi.org/10.1542/peds.2015-1728>
- 1159 Straiko, M. M., Young, C., Cattano, D., Creeley, C. E., Wang, H., Smith, D. J., Johnson, S. A., Li, E. S., &  
1160 Olney, J. W. (2009). Lithium protects against anesthesia-induced developmental  
1161 neuroapoptosis. *Anesthesiology*, 110(4), 862-868.  
1162 <https://doi.org/10.1097/ALN.0b013e31819b5eab>
- 1163 Sun, L. S., Li, G., Miller, T. L., Salorio, C., Byrne, M. W., Bellinger, D. C., Ing, C., Park, R., Radcliffe, J.,  
1164 Hays, S. R., DiMaggio, C. J., Cooper, T. J., Rauh, V., Maxwell, L. G., Youn, A., & McGowan, F. X.  
1165 (2016). Association Between a Single General Anesthesia Exposure Before Age 36 Months  
1166 and Neurocognitive Outcomes in Later Childhood. *Jama*, 315(21), 2312-2320.  
1167 <https://doi.org/10.1001/jama.2016.6967>
- 1168 Sun, M., Dong, Y., Li, M., Zhang, Y., Liang, F., Zhang, J., Soriano, S. G., & Xie, Z. (2021).  
1169 Dexmedetomidine and Clonidine Attenuate Sevoflurane-Induced Tau Phosphorylation and  
1170 Cognitive Impairment in Young Mice via  $\alpha$ -2 Adrenergic Receptor. *Anesth Analg*, 132(3), 878-  
1171 889. <https://doi.org/10.1213/ane.0000000000005268>
- 1172 Szymanski, J., & Minichiello, L. (2022). NKCC1 Deficiency in Forming Hippocampal Circuits Triggers  
1173 Neurodevelopmental Disorder: Role of BDNF-TrkB Signalling. *Brain Sci*, 12(4).  
1174 <https://doi.org/10.3390/brainsci12040502>
- 1175 Tang, X. L., Wang, X., Fang, G., Zhao, Y. L., Yan, J., Zhou, Z., Sun, R., Luo, A. L., & Li, S. Y. (2021).  
1176 Resveratrol ameliorates sevoflurane-induced cognitive impairment by activating the  
1177 SIRT1/NF- $\kappa$ B pathway in neonatal mice. *J Nutr Biochem*, 90, 108579.  
1178 <https://doi.org/10.1016/j.jnutbio.2020.108579>

1179 Tao, G., Zhang, J., Zhang, L., Dong, Y., Yu, B., Crosby, G., Culley, D. J., Zhang, Y., & Xie, Z. (2014).  
 1180 Sevoflurane induces tau phosphorylation and glycogen synthase kinase 3 $\beta$  activation in  
 1181 young mice. *Anesthesiology*, 121(3), 510-527.  
 1182 <https://doi.org/10.1097/aln.0000000000000278>

1183 Tateiwa, H., & Evers, A. S. (2024). Neurosteroids and their potential as a safer class of general  
 1184 anesthetics. *J Anesth*, 38(2), 261-274. <https://doi.org/10.1007/s00540-023-03291-4>

1185 Taylor, G. T., Manzella, F. M., Huffman, J., Cabrera, O. H., & Hoffman, J. (2017). Cognition in female  
 1186 rats after blocking conversion of androgens to estrogens. *Horm Behav*, 90, 84-89.  
 1187 <https://doi.org/10.1016/j.yhbeh.2017.02.011>

1188 Tesic, V., Joksimovic, S. M., Quillinan, N., Krishnan, K., Covey, D. F., Todorovic, S. M., & Jevtovic-  
 1189 Todorovic, V. (2020). Neuroactive steroids alphaxalone and CDNC24 are effective hypnotics  
 1190 and potentiators of GABA(A) currents, but are not neurotoxic to the developing rat brain. *Br J*  
 1191 *Anaesth*, 124(5), 603-613. <https://doi.org/10.1016/j.bja.2020.01.013>

1192 Thomason, E. J., Escalante, M., Osterhout, D. J., & Fuss, B. (2020). The oligodendrocyte growth cone  
 1193 and its actin cytoskeleton: A fundamental element for progenitor cell migration and CNS  
 1194 myelination. *Glia*, 68(7), 1329-1346. <https://doi.org/10.1002/glia.23735>

1195 Timic Stamenic, T., Feseha, S., Manzella, F. M., Wallace, D., Wilkey, D., Corrigan, T., Fiedler, H., Doerr,  
 1196 P., Krishnan, K., Raol, Y. H., Covey, D. F., Jevtovic-Todorovic, V., & Todorovic, S. M. (2021).  
 1197 The T-type calcium channel isoform Ca(v)3.1 is a target for the hypnotic effect of the  
 1198 anaesthetic neurosteroid (3 $\beta$ ,5 $\beta$ ,17 $\beta$ )-3-hydroxyandrostane-17-carbonitrile. *Br J Anaesth*,  
 1199 126(1), 245-255. <https://doi.org/10.1016/j.bja.2020.07.022>

1200 Tu, Y., Liang, Y., Xiao, Y., Lv, J., Guan, R., Xiao, F., Xie, Y., & Xiao, Q. (2019). Dexmedetomidine  
 1201 attenuates the neurotoxicity of propofol toward primary hippocampal neurons in vitro via  
 1202 Erk1/2/CREB/BDNF signaling pathways. *Drug Des Devel Ther*, 13, 695-706.  
 1203 <https://doi.org/10.2147/dddt.S188436>

1204 Vanderhaeghen, P., & Polleux, F. (2023). Developmental mechanisms underlying the evolution of  
 1205 human cortical circuits. *Nat Rev Neurosci*, 24(4), 213-232. <https://doi.org/10.1038/s41583-023-00675-z>

1206

1207 Wan, J., Shen, C. M., Wang, Y., Wu, Q. Z., Wang, Y. L., Liu, Q., Sun, Y. M., Cao, J. P., & Wu, Y. Q. (2021).  
 1208 Repeated exposure to propofol in the neonatal period impairs hippocampal synaptic  
 1209 plasticity and the recognition function of rats in adulthood. *Brain Res Bull*, 169, 63-72.  
 1210 <https://doi.org/10.1016/j.brainresbull.2021.01.007>

1211 Wang, N., & Wang, M. (2019). Dexmedetomidine suppresses sevoflurane anesthesia-induced  
 1212 neuroinflammation through activation of the PI3K/Akt/mTOR pathway. *BMC Anesthesiol*,  
 1213 19(1), 134. <https://doi.org/10.1186/s12871-019-0808-5>

1214 Wang, W. Y., Jia, L. J., Luo, Y., Zhang, H. H., Cai, F., Mao, H., Xu, W. C., Fang, J. B., Peng, Z. Y., Ma, Z. W.,  
 1215 Chen, Y. H., Zhang, J., Wei, Z., Yu, B. W., & Hu, S. F. (2016). Location- and Subunit-Specific  
 1216 NMDA Receptors Determine the Developmental Sevoflurane Neurotoxicity Through ERK1/2  
 1217 Signaling. *Mol Neurobiol*, 53(1), 216-230. <https://doi.org/10.1007/s12035-014-9005-1>

1218 Wang, X., Shan, Y., Tang, Z., Gao, L., & Liu, H. (2019). Neuroprotective effects of dexmedetomidine  
 1219 against isoflurane-induced neuronal injury via glutamate regulation in neonatal rats. *Drug*  
 1220 *Des Devel Ther*, 13, 153-160. <https://doi.org/10.2147/dddt.S163197>

- 1221 Wang, X., Zhao, B., & Li, X. (2015). Dexmedetomidine attenuates isoflurane-induced cognitive  
1222 impairment through antioxidant, anti-inflammatory and anti-apoptosis in aging rat. *Int J Clin*  
1223 *Exp Med*, 8(10), 17281-17288.
- 1224 Ward, R. J., Zucca, F. A., Duyn, J. H., Crichton, R. R., & Zecca, L. (2014). The role of iron in brain ageing  
1225 and neurodegenerative disorders. *Lancet Neurol*, 13(10), 1045-1060.  
1226 [https://doi.org/10.1016/s1474-4422\(14\)70117-6](https://doi.org/10.1016/s1474-4422(14)70117-6)
- 1227 Watanabe, M., & Fukuda, A. (2015). Development and regulation of chloride homeostasis in the  
1228 central nervous system. *Front Cell Neurosci*, 9, 371.  
1229 <https://doi.org/10.3389/fncel.2015.00371>
- 1230 Wei, Y., Hu, J., Liang, Y., Zhong, Y., He, D., Qin, Y., Li, L., Chen, J., Xiao, Q., & Xie, Y. (2016).  
1231 Dexmedetomidine pretreatment attenuates propofol-induced neurotoxicity in neuronal  
1232 cultures from the rat hippocampus. *Mol Med Rep*, 14(4), 3413-3420.  
1233 <https://doi.org/10.3892/mmr.2016.5628>
- 1234 Weiss, M., Hansen, T. G., & Engelhardt, T. (2016). Ensuring safe anaesthesia for neonates, infants and  
1235 young children: what really matters. *Arch Dis Child*, 101(7), 650-652.  
1236 <https://doi.org/10.1136/archdischild-2015-310104>
- 1237 Wu, S. Y., Pan, B. S., Tsai, S. F., Chiang, Y. T., Huang, B. M., Mo, F. E., & Kuo, Y. M. (2020). BDNF  
1238 reverses aging-related microglial activation. *J Neuroinflammation*, 17(1), 210.  
1239 <https://doi.org/10.1186/s12974-020-01887-1>
- 1240 Wu, Z., Xue, H., Gao, Q., & Zhao, P. (2020). Effects of early postnatal sevoflurane exposure on  
1241 oligodendrocyte maturation and myelination in cerebral white matter of the rat. *Biomed*  
1242 *Pharmacother*, 131, 110733. <https://doi.org/10.1016/j.biopha.2020.110733>
- 1243 Wu, Z., Zhang, Y., Zhang, Y., & Zhao, P. (2020). Sirtuin 2 Inhibition Attenuates Sevoflurane-Induced  
1244 Learning and Memory Deficits in Developing Rats via Modulating Microglial Activation. *Cell*  
1245 *Mol Neurobiol*, 40(3), 437-446. <https://doi.org/10.1007/s10571-019-00746-9>
- 1246 Xian, F., Li, Q., & Chen, Z. (2019). Overexpression of phosphoprotein enriched in astrocytes 15  
1247 reverses the damage induced by propofol in hippocampal neurons. *Mol Med Rep*, 20(2),  
1248 1583-1592. <https://doi.org/10.3892/mmr.2019.10412>
- 1249 Xiao, Y., Zhou, L., Tu, Y., Li, Y., Liang, Y., Zhang, X., Lv, J., Zhong, Y., & Xie, Y. (2018). Dexmedetomidine  
1250 attenuates the propofol-induced long-term neurotoxicity in the developing brain of rats by  
1251 enhancing the PI3K/Akt signaling pathway. *Neuropsychiatr Dis Treat*, 14, 2191-2206.  
1252 <https://doi.org/10.2147/ndt.S169099>
- 1253 Xu, J., Mathena, R. P., Xu, M., Wang, Y., Chang, C., Fang, Y., Zhang, P., & Mintz, C. D. (2018). Early  
1254 Developmental Exposure to General Anesthetic Agents in Primary Neuron Culture Disrupts  
1255 Synapse Formation via Actions on the mTOR Pathway. *Int J Mol Sci*, 19(8).  
1256 <https://doi.org/10.3390/ijms19082183>
- 1257 Yan, J., Huang, Y., Lu, Y., Chen, J., & Jiang, H. (2014). Repeated administration of ketamine can induce  
1258 hippocampal neurodegeneration and long-term cognitive impairment via the ROS/HIF-1 $\alpha$   
1259 pathway in developing rats. *Cell Physiol Biochem*, 33(6), 1715-1732.  
1260 <https://doi.org/10.1159/000362953>
- 1261 Yang, F., Zhang, Y., Tang, Z., Shan, Y., Wu, X., & Liu, H. (2020). Hemin treatment protects neonatal rats  
1262 from sevoflurane-induced neurotoxicity via the phosphoinositide 3-kinase/Akt pathway. *Life*  
1263 *Sci*, 242, 117151. <https://doi.org/10.1016/j.lfs.2019.117151>

- 1264 Yang, M., Lian, N., Yu, Y., Wang, Y., Xie, K., & Yu, Y. (2020). Coenzyme Q10 alleviates  
1265 sevoflurane-induced neuroinflammation by regulating the levels of apolipoprotein E and  
1266 phosphorylated tau protein in mouse hippocampal neurons. *Mol Med Rep*, 22(1), 445-453.  
1267 <https://doi.org/10.3892/mmr.2020.11131>
- 1268 Yang, M., & Wei, H. (2017). Anesthetic neurotoxicity: Apoptosis and autophagic cell death mediated  
1269 by calcium dysregulation. *Neurotoxicol Teratol*, 60, 59-62.  
1270 <https://doi.org/10.1016/j.ntt.2016.11.004>
- 1271 Yang, X., Lin, C., Chen, S., Huang, Y., Cheng, Q., & Yao, Y. (2022). Remimazolam for the Prevention of  
1272 Emergence Delirium in Children Following Tonsillectomy and Adenoidectomy Under  
1273 Sevoflurane Anesthesia: A Randomized Controlled Study. *Drug Des Devel Ther*, 16, 3413-  
1274 3420. <https://doi.org/10.2147/dddt.S381611>
- 1275 Yang, Y., Yi, J., Pan, M., Hu, B., & Duan, H. (2021). Edaravone Alleviated Propofol-Induced  
1276 Neurotoxicity in Developing Hippocampus by mBDNF/TrkB/PI3K Pathway. *Drug Des Devel*  
1277 *Ther*, 15, 1409-1422. <https://doi.org/10.2147/dddt.S294557>
- 1278 Ye, X., Lian, Q., Eckenhoff, M. F., Eckenhoff, R. G., & Pan, J. Z. (2013). Differential general anesthetic  
1279 effects on microglial cytokine expression. *PLoS One*, 8(1), e52887.  
1280 <https://doi.org/10.1371/journal.pone.0052887>
- 1281 Yeh, F. L., Hansen, D. V., & Sheng, M. (2017). TREM2, Microglia, and Neurodegenerative Diseases.  
1282 *Trends Mol Med*, 23(6), 512-533. <https://doi.org/10.1016/j.molmed.2017.03.008>
- 1283 Yon, J. H., Carter, L. B., Reiter, R. J., & Jevtovic-Todorovic, V. (2006). Melatonin reduces the severity of  
1284 anesthesia-induced apoptotic neurodegeneration in the developing rat brain. *Neurobiol Dis*,  
1285 21(3), 522-530. <https://doi.org/10.1016/j.nbd.2005.08.011>
- 1286 Yu, Z., Wang, J., Wang, H., Wang, J., Cui, J., & Junzhang, P. (2020). Effects of Sevoflurane Exposure  
1287 During Late Pregnancy on Brain Development and Beneficial Effects of Enriched Environment  
1288 on Offspring Cognition. *Cell Mol Neurobiol*, 40(8), 1339-1352.  
1289 <https://doi.org/10.1007/s10571-020-00821-6>
- 1290 Zeng, Z., Yao, J., Zhong, J., Fan, S., Xue, Y., Chen, X., Luo, Y., & Xue, S. (2021). The Role of the lncRNA-  
1291 LRCF in Propofol-Induced Oligodendrocyte Damage in Neonatal Mouse. *Neurochem Res*,  
1292 46(4), 778-791. <https://doi.org/10.1007/s11064-020-03205-w>
- 1293 Zhang, H., Li, J., Su, X., Hu, Y., Liu, T., Ni, S., Li, H., Zuo, X. N., Fu, J., Yuan, T. F., & Yang, Z. (2022).  
1294 Growth charts of brain morphometry for preschool children. *Neuroimage*, 255, 119178.  
1295 <https://doi.org/10.1016/j.neuroimage.2022.119178>
- 1296 Zhang, L., Cheng, Y., Xue, Z., Li, J., Wu, N., Yan, J., Wang, J., Wang, C., Chen, W., Zhou, T., Qiu, Z., &  
1297 Jiang, H. (2022). Sevoflurane impairs m6A-mediated mRNA translation and leads to fine  
1298 motor and cognitive deficits. *Cell Biol Toxicol*, 38(2), 347-369.  
1299 <https://doi.org/10.1007/s10565-021-09601-4>
- 1300 Zhang, S., Liang, Z., Sun, W., & Pei, L. (2017). Repeated propofol anesthesia induced downregulation  
1301 of hippocampal miR-132 and learning and memory impairment of rats. *Brain Res*, 1670, 156-  
1302 164. <https://doi.org/10.1016/j.brainres.2017.04.011>
- 1303 Zhang, Y., Xiao, X., Zhang, X. M., Zhao, Z. Q., & Zhang, Y. Q. (2012). Estrogen facilitates spinal cord  
1304 synaptic transmission via membrane-bound estrogen receptors: implications for pain  
1305 hypersensitivity. *J Biol Chem*, 287(40), 33268-33281.  
1306 <https://doi.org/10.1074/jbc.M112.368142>

1307 Zhao, T., Li, C., Wei, W., Zhang, H., Ma, D., Song, X., & Zhou, L. (2016). Prenatal ketamine exposure  
 1308 causes abnormal development of prefrontal cortex in rat. *Sci Rep*, 6, 26865.  
 1309 <https://doi.org/10.1038/srep26865>  
 1310 Zhao, X., Li, Z., Guo, Y., Liu, Q., Qing, M., Sheng, Y., Chen, Y., Xie, L., & Zhou, Z. (2023). Alfaxalone  
 1311 Alleviates Neurotoxicity and Cognitive Impairment Induced by Isoflurane Anesthesia in  
 1312 Offspring Rats. *Anesth Analg*, 136(6), 1206-1216.  
 1313 <https://doi.org/10.1213/ane.0000000000006420>  
 1314 Zheng, H., Dong, Y., Xu, Z., Crosby, G., Culley, D. J., Zhang, Y., & Xie, Z. (2013). Sevoflurane anesthesia  
 1315 in pregnant mice induces neurotoxicity in fetal and offspring mice. *Anesthesiology*, 118(3),  
 1316 516-526. <https://doi.org/10.1097/ALN.0b013e3182834d5d>  
 1317 Zhou, B., Chen, L., Liao, P., Huang, L., Chen, Z., Liao, D., Yang, L., Wang, J., Yu, G., Wang, L., Zhang, J.,  
 1318 Zuo, Y., Liu, J., & Jiang, R. (2019). Astroglial dysfunctions drive aberrant synaptogenesis and  
 1319 social behavioral deficits in mice with neonatal exposure to lengthy general anesthesia. *PLoS*  
 1320 *Biol*, 17(8), e3000086. <https://doi.org/10.1371/journal.pbio.3000086>  
 1321 Zhou, Z. W., Shu, Y., Li, M., Guo, X., Pac-Soo, C., Maze, M., & Ma, D. (2011). The glutaminergic,  
 1322 GABAergic, dopaminergic but not cholinergic neurons are susceptible to anaesthesia-induced  
 1323 cell death in the rat developing brain. *Neuroscience*, 174, 64-70.  
 1324 <https://doi.org/10.1016/j.neuroscience.2010.10.009>  
 1325 Zhu, R., Liu, L., Mao, T., Wang, X., Li, Y., Li, T., Lv, S., Zeng, S., Fu, N., Li, N., Wang, Y., Sun, M., & Zhang,  
 1326 J. (2024). Mfn2 regulates mitochondria and mitochondria-associated endoplasmic reticulum  
 1327 membrane function in neurodegeneration induced by repeated sevoflurane exposure. *Exp*  
 1328 *Neurol*, 377, 114807. <https://doi.org/10.1016/j.expneurol.2024.114807>  
 1329 Zuo, Y., Li, B., Xie, J., Ma, Z., Thirupathi, A., Yu, P., Gao, G., Zhou, J., Zhou, C., Xu, H., Chang, Y., & Shi, Z.  
 1330 (2020). Sevoflurane anesthesia during pregnancy in mice induces cognitive impairment in the  
 1331 offspring by causing iron deficiency and inhibiting myelinogenesis. *Neurochem Int*, 135,  
 1332 104693. <https://doi.org/10.1016/j.neuint.2020.104693>  
 1333

## FIGURES LEGENDS

### **Fig. 1 Mechanisms of Developmental Neurotoxicity Induced by Anesthetics Targeting GABA<sub>A</sub> Receptors**

Anesthetic drugs target GABA<sub>A</sub> receptors (GABA<sub>A</sub>R) in immature neurons, leading to developmental neurotoxicity. Black arrows represent the direct effects of anesthetic drugs on immature neurons, while red arrows indicate the subsequent effects triggered by the inhibition of relevant signaling pathways. The underlying mechanisms include: GA upregulating NKCC1 and downregulating KCC2, thereby enhancing GABA-mediated excitatory signaling, which leads to excessive calcium influx and calcium overload. This overload then triggers neuroinflammation and exacerbates oxidative stress. Through NMDAR-mediated excitatory/inhibitory imbalance (E/I imbalance), synaptic plasticity is disrupted, with a reduction in PSD95 and related proteins, as well as inhibition of long-term potentiation (LTP). Furthermore, GA affects the BDNF signaling pathway by enhancing BDNF/ P75<sup>NTR</sup>, inhibiting BDNF/TrkB signaling, and causing BDNF dysregulation. Simultaneously, it interferes with abnormal ncRNA and PTP-1B signaling pathways, inducing endoplasmic reticulum stress, which ultimately results in neuronal damage.

### **Fig. 2 The Effects of Anesthetics Targeting GABA<sub>A</sub> Receptors on Different Neuronal Populations**

Anesthetic agents activate microglia, triggering the release of pro-inflammatory cytokines and M1 markers, which in turn exacerbate neuroinflammation. These drugs induce massive apoptosis in oligodendrocytes, leading to neuronal demyelination. Notably, iron and folate have been shown to mitigate this demyelination process. Furthermore, anesthetics interfere with astrocyte function via the ERK pathway, disrupting BDNF metabolism and ultimately leading to neuronal apoptosis. This cascade of events underscores the harmful effects of anesthetics on neurodevelopment, particularly in the context of inflammation-induced apoptosis in both neurons and glial cells.

### **Fig. 3 Neuroprotective Mechanisms of NAS**

NAS exerts neuroprotective effects through multiple pathways. The mechanisms are as follows: black arrows indicate the direct effects of anesthetics on immature neurons, while red arrows represent subsequent effects induced by the inhibition of related signaling pathways. NAS interacts with TLR2, TLR4, and TLR7 and their adaptor proteins to reduce the production of inflammatory factors, thereby alleviating neuronal inflammation. NAS also regulates the synthesis of mBDNF through receptors such as GPER1, ERα/β, and PXR. mBDNF activates MEK/ERK, PI3K/AKT, and PLCγ/PKC signaling pathways through TrkA/B receptors, inhibiting ROS production, alleviating mitochondrial dysfunction, reducing neuronal apoptosis, enhancing neurotransmitter release, and activating NMDAR to promote LTP formation, thus increasing synaptic plasticity. Additionally, NAS may exert anesthetic effects by modulating GABA<sub>A</sub>Rs and calcium ions while enhancing neuronal regeneration to further protect the nervous system. NAS, DEX, and EPO reduce neuroinflammation and exhibit anti-apoptotic and neuroprotective effects through the BDNF/TrkB pathway, while Clobenpropit, Edaravone, and Doxycycline act through the BDNF/PI3K pathway. Melatonin increases BDNF production through Nrf2, while L-Ca, Curcumin, and Resveratrol reduce oxidative stress, and Etanercept reduces the production of inflammatory factors.

### **Fig. 4. The Impact of Anesthetic Agents on Different Brain Regions During Development**

Neurodevelopmental trajectories based on global pediatric MRI data are presented, with the y-axis representing the percentage of maximum volume attained by each brain region during development, and



1377 the x-axis representing age. The yellow shaded region highlights the period of anesthesia vulnerability,  
1378 in comparison to the critical peak developmental periods for various brain functions. The impact of  
1379 anesthetic drugs on different brain regions is shown, with highlighted areas indicating regions  
1380 particularly vulnerable to anesthesia-induced damage. BGS: brain growth spurt; GMV: total cortical grey  
1381 matter volume; WMV: total white matter volume; CSF: total ventricular cerebrospinal fluid volume  
1382 (ventricles or cerebrospinal fluid); MCT: mean cortical thickness; TSA: total surface area; TCV: total  
1383 cerebrum volume.

1384 **Fig. 5 Graphical Abstract: Mechanisms of Anesthetic-Induced Neurotoxicity Targeting GABA<sub>A</sub>**  
1385 **Receptors and Associated Susceptibility Factors**

1386 Neonatal brain development occurs during a critical period, and anesthetic-induced neurotoxicity during  
1387 this time is influenced by multiple complex factors, including the mechanisms of anesthetic drugs  
1388 targeting GABA receptors and associated susceptibility factors. The interplay of these factors contributes  
1389 to the formation of a complex mechanism underlying neonatal neurotoxicity induced by anesthesia.

1390

1391 **Fig. 1 Mechanisms of Developmental Neurotoxicity Induced by Anesthetics Targeting GABA<sub>A</sub>**  
1392 **Receptors**

1393

1394 **Fig. 2** The Effects of Anesthetics Targeting GABA<sub>A</sub> Receptors on Different Neuronal Populations

1395 **Fig. 3 Neuroprotective Mechanisms of NAS**

1396 **Fig. 4 The Impact of Anesthetic Agents on Different Brain Regions During Development**

1397

1398



1399 **Fig. 5 Graphical Abstract: Mechanisms of Anesthetic-Induced Neurotoxicity Targeting GABA<sub>A</sub>**

1400 **Receptors and Associated Susceptibility Factors**

1401

1402 Fig. 1-5 Created with BioRender.com.

1403

14%

SIMILARITY INDEX

PRIMARY SOURCES

|   |                                                                                                                                                                                                                                                                                                                                                                       |                 |
|---|-----------------------------------------------------------------------------------------------------------------------------------------------------------------------------------------------------------------------------------------------------------------------------------------------------------------------------------------------------------------------|-----------------|
| 1 | <a href="https://link.springer.com">link.springer.com</a><br>Internet                                                                                                                                                                                                                                                                                                 | 110 words — 1%  |
| 2 | <a href="https://www.frontiersin.org">www.frontiersin.org</a><br>Internet                                                                                                                                                                                                                                                                                             | 72 words — 1%   |
| 3 | Jing Zhang, Yu Li. "Propofol-Induced Developmental Neurotoxicity: From Mechanisms to Therapeutic Strategies", ACS Chemical Neuroscience, 2023<br>Crossref                                                                                                                                                                                                             | 34 words — < 1% |
| 4 | Mingyang Sun, Xiaoling Wang, Zhongyuan Lu, Yitian Yang, Shuang Lv, Mengrong Miao, Wan-Ming Chen, Szu-Yuan Wu, Jiaqiang Zhang. "Comparative effectiveness of SGLT2 inhibitors and GLP-1 receptor agonists in preventing Alzheimer's disease, vascular dementia, and other dementia types among patients with type 2 diabetes", Diabetes & Metabolism, 2025<br>Crossref | 27 words — < 1% |
| 5 | Qiu-Xia Xiao, Min-Jian Geng, Qiu-Lin Wang, Chang-Le Fang, Jing-Han Zhang, Qi Liu, Liu-Liu Xiong. "Unraveling the Effects of Prenatal Anesthesia on Neurodevelopment: A Review of Current Evidence and Future Directions", NeuroToxicology, 2024<br>Crossref                                                                                                           | 25 words — < 1% |
| 6 | <a href="https://smarttots.org">smarttots.org</a><br>Internet                                                                                                                                                                                                                                                                                                         | 24 words — < 1% |

|    |                                                                                                                                                                                                                                                                                           |                 |
|----|-------------------------------------------------------------------------------------------------------------------------------------------------------------------------------------------------------------------------------------------------------------------------------------------|-----------------|
| 7  | Atanu Bhattacharjee, Akula Ramakrishna, Magisetty Obulesu. "Phytomedicine and Alzheimer's Disease", CRC Press, 2020<br>Publications                                                                                                                                                       | 22 words — < 1% |
| 8  | Francesca M. Manzella, Douglas F. Covey, Vesna Jevtovic-Todorovic, Slobodan M. Todorovic. "Synthetic neuroactive steroids as new sedatives and anaesthetics: Back to the future", Journal of Neuroendocrinology, 2022<br>Crossref                                                         | 22 words — < 1% |
| 9  | mdpi-res.com<br>Internet                                                                                                                                                                                                                                                                  | 22 words — < 1% |
| 10 | Ningning Fu, Yangyang Wang, Ruilou Zhu, Ningning Li, Shuang Zeng, Mengrong Miao, Yitian Yang, Mingyang Sun, Jiaqiang Zhang. "Bicuculline and Bumetanide Attenuate Sevoflurane-Induced Impairment of Myelination and Cognition in Young Mice", ACS Chemical Neuroscience, 2023<br>Crossref | 21 words — < 1% |
| 11 | coek.info<br>Internet                                                                                                                                                                                                                                                                     | 20 words — < 1% |
| 12 | www.researchsquare.com<br>Internet                                                                                                                                                                                                                                                        | 20 words — < 1% |
| 13 | pmc.ncbi.nlm.nih.gov<br>Internet                                                                                                                                                                                                                                                          | 19 words — < 1% |
| 14 | Kantarakorn Unchiti, Prangmalee Leurcharusmee, Artid Samerchua, Tanyong Pipanmekaporn et al. "The Potential Role of Dexmedetomidine                                                                                                                                                       | 18 words — < 1% |

---

15 Thiago Arzua, Congshan Jiang, Yasheng Yan, Xiaowen Bai. "The importance of non-coding RNAs in environmental stress-related developmental brain disorders: A systematic review of evidence associated with exposure to alcohol, anesthetic drugs, nicotine, and viral infections", Neuroscience & Biobehavioral Reviews, 2021

18 words — < 1%

Crossref

---

16 Wen-Liang Yan, Wenliang Yan, Xitong Liang, Yang Li et al. "Genome-wide association analyses for revealing QTN, QTN-by-environment and QTN-by-QTN interactions in soybean phenology", Springer Science and Business Media LLC, 2024

18 words — < 1%

Crossref Posted Content

---

17 [www2.mdpi.com](http://www2.mdpi.com)

Internet

17 words — < 1%

---

18 Rosalva Mora-Escobedo, Gloria Dávila-Ortiz, Gustavo F. Gutiérrez López, José J. Berrios. "Health-Promoting Food Ingredients during Processing", Routledge, 2024

16 words — < 1%

Publications

---

19 [hdl.handle.net](http://hdl.handle.net)

Internet

16 words — < 1%

---

20 [onlinelibrary.wiley.com](http://onlinelibrary.wiley.com)

Internet

16 words — < 1%

---

21 [www.jneurosci.org](http://www.jneurosci.org)

Internet

16 words — < 1%

---

22 Bonnie Robinson, Qiang Gu, Jyotshna Kanungo. 15 words — < 1%  
"Antidepressant Actions of Ketamine: Potential  
Role of L-Type Calcium Channels", Chemical Research in  
Toxicology, 2021  
[Crossref](#)

---

23 Chao Ji, Qiang Ni, Wurong Chen, Zeyong Yang, 15 words — < 1%  
Daqing Ma. "General anesthetic neurotoxicity in  
the young: Mechanism and prevention", Neuroscience &  
Biobehavioral Reviews, 2019  
[Crossref](#)

---

24 Yi Wei, Junhua Hu, Yubing Liang, Yuling Zhong, 15 words — < 1%  
Dan He, Yi Qin, Li Li, Jing Chen, Qiang Xiao, Yubo  
Xie. "Dexmedetomidine pretreatment attenuates propofol-  
induced neurotoxicity in neuronal cultures from the rat  
hippocampus", Molecular Medicine Reports, 2016  
[Crossref](#)

---

25 Danfeng Yang, Junwei Su, Yeru Chen, Gang Chen. 14 words — < 1%  
"The NF-κB pathway: Key players in  
neurocognitive functions and related disorders", European  
Journal of Pharmacology, 2024  
[Crossref](#)

---

26 Fahad Iqbal, Andrew J. Thompson, Saba Riaz, 13 words — < 1%  
Marcus Pehar, Tiffany Rice, Naweed I. Syed.  
"Anesthetics: from modes of action to unconsciousness and  
neurotoxicity", Journal of Neurophysiology, 2019  
[Crossref](#)

---

27 Yan Jin, Song Cai, Yuepeng Jiang, Kai Zhong, 13 words — < 1%  
Chengping Wen, Yeping Ruan, Lindsey A. Chew,  
Rajesh Khanna, Zhenghao Xu, Jie Yu. "Tetramethylpyrazine  
Reduces Epileptogenesis Progression in Electrical Kindling  
Models by Modulating Hippocampal Excitatory  
Neurotransmission", ACS Chemical Neuroscience, 2019



- 
- 28 "Handbook of Neurotoxicity", Springer Nature, 2014  
Crossref 12 words — < 1%
- 
- 29 "Mitochondrial Biology and Experimental Therapeutics", Springer Science and Business Media LLC, 2018  
Crossref 12 words — < 1%
- 
- 30 Biswas, Bharti. "Effect of Combined Early Life Stressors on Brain and Behaviour in Rat Offspring.", University of New South Wales (Australia)  
ProQuest 12 words — < 1%
- 
- 31 Annalisa Savardi, Ilias Ziogas, Maria Bolla, Laura Cancedda. "Chloride transporters in physiological brain development and neurodevelopmental disorders: The case of the Down syndrome", Elsevier BV, 2020  
Crossref 11 words — < 1%
- 
- 32 Kantarakorn Unchiti, Prangmalee Leurcharusmee, Artid Samerchua, Tanyong Pipanmekaporn et al. "The potential role of dexmedetomidine on neuroprotection and its possible mechanisms: Evidence from in vitro and in vivo studies", European Journal of Neuroscience, 2021  
Crossref 11 words — < 1%
- 
- 33 academic.oup.com  
Internet 11 words — < 1%
- 
- 34 www.medrxiv.org  
Internet 11 words — < 1%
- 
- 35 Andreas W. Loepke. "Developmental neurotoxicity of sedatives and anesthetics: A

- 36 Dan Zhao, Minli Zhang, Lingling Yang, Mingquan Zeng. "GPR68 Improves Nerve Damage and Myelination in an Immature Rat Model Induced by Sevoflurane Anesthesia by Activating cAMP/CREB to Mediate BDNF", ACS Chemical Neuroscience, 2022 10 words — < 1%

- 37 Diogo Dominguni, Amanda V. Steckert, Monique Michels, Mariana B. Spies et al. "The effects of anaesthetics and sedatives on brain inflammation", Neuroscience & Biobehavioral Reviews, 2021 10 words — < 1%

- 38 Félicie Lorenc, Luc Dupuis, Raphaëlle Cassel. "Impairments of inhibitory neurons in amyotrophic lateral sclerosis and frontotemporal dementia", Neurobiology of Disease, 2024 10 words — < 1%

- 39 Laura Castañeda-Martinez, Kevin K. Noguchi, Chrysanthy Ikonomidou, James A. Zagzebski, Timothy J. Hall, Ivan M. Rosado-Mendez. "Optimization of Ultrasound Backscatter Spectroscopy to Assess Neurotoxic Effects of Anesthesia in the Newborn Non-human Primate Brain", Ultrasound in Medicine & Biology, 2020 10 words — < 1%

- 40 Lili Xu, Qi Xu, Shaobing Dai, Cuicui Jiao, Yingying Tang, Jiaqian Xie, Hui Wu, Xinzhong Chen. "lncRNA Xist regulates sevoflurane-induced social and emotional impairment by modulating miR-98-5p/EDEM1 signaling axis in neonatal mice", Molecular Therapy - Nucleic Acids, 2021 10 words — < 1%

---

41 Shetty, Ashok K. "Studies on Developmental Exposures to Anesthetic Agents and Stem Cell Derived Models", Neural Stem Cells in Health and Disease, 2015. 10 words — < 1%

[Crossref](#)

---

42 Cheng, Yuan, Qiaoying Li, Yidan Zhang, Quan Wen, and Jianjun Zhao. "Effects of Female Sex Hormones on Expression of Ang-(1-7)-Mas-R-nNOS Pathways in Rat Brain", Canadian Journal of Physiology and Pharmacology, 2015. 9 words — < 1%

[Crossref](#)

---

43 E.B. Engler-Chiurazzi, C.M. Brown, J.M. Povroznik, J.W. Simpkins. "Estrogens as neuroprotectants: Estrogenic actions in the context of cognitive aging and brain injury", Progress in Neurobiology, 2017. 9 words — < 1%

[Crossref](#)

---

44 Genghua Xu, Nuoya Liu, Yaqing Qiu, Jiayu Qi, Danyan Zhu. "Role of Histamine H3 Receptor Antagonist Pitolisant in Early Neural Differentiation of Mouse Embryonic Stem Cells", Stem Cells and Development, 2023. 9 words — < 1%

[Crossref](#)

---

45 Guo, Peipei, Zhibin Huang, Tao Tao, Xiaohui Chen, Wenqing Zhang, Yiyue Zhang, and Chunshui Lin. "Zebrafish as a model for studying the developmental neurotoxicity of propofol : Developmental neurotoxicity of propofol in zebrafish", Journal of Applied Toxicology, 2015. 9 words — < 1%

[Crossref](#)

---

46 Jing Lv, Yubing Liang, Youbing Tu, Jing Chen, Yubo Xie. "Hypoxic preconditioning reduces propofol-induced neuroapoptosis via regulation of Bcl-2 and Bax and downregulation of activated caspase-3 in the hippocampus of neonatal rats", Neurological Research, 2018. 9 words — < 1%

[Crossref](#)

---

47 Lijuan Shu, Chunfu Du. "PHLDA1 promotes sevoflurane-induced pyroptosis of neuronal cells in developing rats through TRAF6-mediated activation of Rac1", *NeuroToxicology*, 2022

Crossref

9 words — < 1%

---

48 Luís F. Martins, Rui O. Costa, Joana R. Pedro, Paulo Aguiar et al. "Mesenchymal stem cells secretome-induced axonal outgrowth is mediated by BDNF", *Scientific Reports*, 2017

Crossref

9 words — < 1%

---

49 Olutoyin A. Olutoye, Candace Style, Alicia Menchaca. "Neurocognitive Effects of Fetal Exposure to Anesthesia", *Anesthesiology Clinics*, 2021

Crossref

9 words — < 1%

---

50 Yang Zhang, Shan Liu, Jiu-Long Ma, Chen Chen, Peng Huang, Jia-Hua Ji, Di Wu, Li-Qun Ren. "Apocynum venetum leaf extract alleviated doxorubicin-induced cardiotoxicity through the AKT/Bcl-2 signaling pathway", *Phytomedicine*, 2021

Crossref

9 words — < 1%

---

51 aopwiki.org

Internet

9 words — < 1%

---

52 discovery.ucl.ac.uk

Internet

9 words — < 1%

---

53 hal-amu.archives-ouvertes.fr

Internet

9 words — < 1%

---

54 opac.lib.idu.ac.id

Internet

9 words — < 1%

- 
- 55 "Neonatal Anesthesia", Springer Science and Business Media LLC, 2023 8 words — < 1%  
Crossref
- 
- 56 Abdelhamid, Ramy, Jia Luo, Lawren VandeVrede, Indraneel Kundu, Bradley Michalsen, Vladislav A. Litosh, Isaac T. Schiefer, Teshome Gherezghiher, Ping Yao, Zhihui Qin, and Gregory R. J. Thatcher. "Benzothiophene Selective Estrogen Receptor Modulators Provide Neuroprotection by a Novel GPR30-Dependent Mechanism", ACS Chemical Neuroscience, 2011. 8 words — < 1%  
Crossref
- 
- 57 Anita C. Truttmann, Vanessa Ginet, Julien Puyal. "Current Evidence on Cell Death in Preterm Brain Injury in Human and Preclinical Models", Frontiers in Cell and Developmental Biology, 2020 8 words — < 1%  
Crossref
- 
- 58 Chun-Yun Zhang, Fang-Fang He, Hua Su, Chun Zhang, Xian-Fang Meng. "Association between chronic kidney disease and Alzheimer's disease: an update", Metabolic Brain Disease, 2020 8 words — < 1%  
Crossref
- 
- 59 Doboszevska, Urszula, Bernadeta Szewczyk, Magdalena Sowa-Kućma, Karolina Noworyta-Sokołowska, Paulina Misztak, Joanna Gołębiowska, Katarzyna Młyniec, Beata Ostachowicz, Mirosław Krośniak, Agnieszka Wojtanowska-Krośniak, Krystyna Gołębiewska, Marek Lankosz, Wojciech Piekoszewski, and Gabriel Nowak. "Alterations of Bio-elements, Oxidative, and Inflammatory Status in the Zinc Deficiency Model in Rats", Neurotoxicity Research, 2015. 8 words — < 1%  
Crossref

60 Fei-Fei Ma, Run-Hui Ma, Wang-Wei Zhang, Xiu-Xiu Zhang, Qian Zhong, Kiran Thakur, Jian-Guo Zhang, Jesus Simal-Gandara, Hui Cao. "Neferine induces apoptosis and inhibits metastasis in human endometrial cancer cells by down-regulating miR-1266-5p", Food Bioscience, 2025

Crossref

61 Groark, Christina J.; McCarthy, Stephanie K.; Kirk, Afton R. . "Early Childhood Development: From Theory to Practice, Second Edition", UAGC, 2023

Publications

62 Hisham F. Bahmad, Batoul Darwish, Karem Bou Dargham, Rabih Machmouchi et al. "Role of MicroRNAs in Anesthesia-Induced Neurotoxicity in Animal Models and Neuronal Cultures: a Systematic Review", Neurotoxicity Research, 2019

Crossref

63 Hocker, Austin D., Jennifer A. Stokes, Frank L. Powell, and Adrienne G. Huxtable. "The impact of inflammation on respiratory plasticity", Experimental Neurology, 2016.

Crossref

64 Jennifer L. Walters, Merle G. Paule. "Review of preclinical studies on pediatric general anesthesia-induced developmental neurotoxicity", Neurotoxicology and Teratology, 2017

Crossref

65 Kokane, Saurabh S., and Qing Lin. "Impact of Early Life Ketamine Exposure on the Developing Brain and Cognitive Sequelae", Neuropathology of Drug Addictions and Substance Misuse, 2016.

Crossref



66 Martin Mortensen, Yue Xu, Mohamed A. Shehata, Jacob Krall, Margot Ernst, Bente Frølund, Trevor G. Smart. " Pregnenolone sulfate analogues differentially modulate GABA receptor closed/desensitised states ", British Journal of Pharmacology, 2023

8 words — < 1%

[Crossref](#)

67 Mary Ellen McCann, Sulpicio G. Soriano. "General Anesthetics in Pediatric Anesthesia: Influences on the Developing Brain", Current Drug Targets, 2012

8 words — < 1%

[Crossref](#)

68 N. Lunardi. "General Anesthesia Causes Long-Lasting Disturbances in the Ultrastructural Properties of Developing Synapses in Young Rats", Neurotoxicity Research, 07/21/2009

8 words — < 1%

[Crossref](#)

69 Ngoc Kim Cuong Tran, Ji Hoon Jeong, Naveen Sharma, Yen Nhi Doan Nguyen et al. "Ginsenoside Re blocks Bay k-8644-induced neurotoxicity via attenuating mitochondrial dysfunction and PKC $\delta$  activation in the hippocampus of mice: Involvement of antioxidant potential", Food and Chemical Toxicology, 2023

8 words — < 1%

[Crossref](#)

70 Oliver Henschel, Keith Gipson, Angelique Bordey. "GABAA Receptors, Anesthetics and Anticonvulsants in Brain Development", CNS & Neurological Disorders - Drug Targets, 2008

8 words — < 1%

[Crossref](#)

71 Omar Hoseá Cabrera, Nemanja Useinovic, Stefan Maksimovic, Michelle Near et al. "Neonatal ketamine exposure impairs infrapyramidal bundle pruning and causes lasting increase in excitatory synaptic transmission in hippocampal CA3 neurons", Neurobiology of Disease, 2022

8 words — < 1%

72 Shan Lei, Pan Lu, Yang Lu, Juan Zheng et al. "Dexmedetomidine Alleviates Neurogenesis Damage Following Neonatal Midazolam Exposure in Rats through JNK and P38 MAPK Pathways", ACS Chemical Neuroscience, 2020

8 words — < 1%

Crossref

73 Vinayak Mishra, Brian Sims, Margaret Kuper-Sassé, Akhil Maheshwari. "Neurodevelopmental Impairment in Specific Neonatal Disorders", Elsevier BV, 2024

8 words — < 1%

Crossref

74 Yafang Liu, Daowei Lin, Chuiliang Liu, Yifan Zhao, Zhiwen Shen, Kun Zhang, Minghui Cao, Yujuan Li. "Cyclin-dependent kinase 5/Collapsin response mediator protein 2 pathway may mediate sevoflurane-induced dendritic development abnormalities in rat cortical neurons", Neuroscience Letters, 2017

8 words — < 1%

Crossref

75 Youbing Tu, Yubing Liang, Yong Xiao, Jing Lv, Ruicong Guan, Fei Xiao, Yubo Xie, Qiang Xiao. "Dexmedetomidine attenuates the neurotoxicity of propofol toward primary hippocampal neurons in vitro via Erk1/2/CREB/BDNF signaling pathways", Drug Design, Development and Therapy, 2019

8 words — < 1%

Crossref

76 Yu Hou, Shuai Li, Qi Hou, Runjia Wang, Xiyuan Xu, Zhichao Li, Linhui Ma, Qidong Liu, Yuan Shen, Hui Zheng. "Vitamin K2 mitigates cognitive, and motor impairments induced by multiple surgery with anesthesia and analgesia in neonatal stage", Biochemical and Biophysical Research Communications, 2025

8 words — < 1%

Crossref

77 Yuying Huang, Jingwen Xu, Yihai Wang, Yanqiong Lei, Yongxin Mai, Xiangjiu He. "Q43, a new triterpenoid extracted from Chinese acorn, exhibits pronounced anti-neuroinflammatory activity through the MAPK and NF-κB pathways", Journal of Functional Foods, 2021

Crossref

78 Zachary Fleissner, Antonia Schonwald, Neil Patel, Benjamin F. Gruenbaum, Valerie A. Smart, Shaun E. Gruenbaum. "Neurotoxicity and translational research", Elsevier BV, 2022

Crossref

79 Zhi-Li Yao, Qing-Nan Li, Yong-Ji Li, Hao-Rui Li et al. "CRISPR/Cas12a-based fluorescence-colorimetric dual-mode strategy for sensitive detection of clear cell renal cell carcinoma biomarker miR-210-3p", Sensors and Actuators B: Chemical, 2025

Crossref

80 [d.docksci.com](https://d.docksci.com) 8 words — < 1%

Internet

81 [journals.lww.com](https://journals.lww.com) 8 words — < 1%

Internet

82 [openrepository.aut.ac.nz](https://openrepository.aut.ac.nz) 8 words — < 1%

Internet

83 [qspace.library.queensu.ca](https://qspace.library.queensu.ca) 8 words — < 1%

Internet

84 [rcastoragev2.blob.core.windows.net](https://rcastoragev2.blob.core.windows.net) 8 words — < 1%

Internet

85 [su.diva-portal.org](https://su.diva-portal.org) 8 words — < 1%

Internet

- 
- 86 [wiredspace.wits.ac.za](https://wiredspace.wits.ac.za) 8 words — < 1%  
Internet
- 
- 87 [www.biorxiv.org](https://www.biorxiv.org) 8 words — < 1%  
Internet
- 
- 88 [www.grafiati.com](https://www.grafiati.com) 8 words — < 1%  
Internet
- 
- 89 A. Leslie Morrow, Minna H. McFarland, Todd K. O'Buckley, Donita L. Robinson. "Emerging evidence for pregnane steroid therapeutics for alcohol use disorders", Elsevier BV, 2024 7 words — < 1%  
Crossref
- 
- 90 Baptiste Riffault, Igor Medina, Camille Dumon, Carine Thalman et al. "Pro-Brain-Derived Neurotrophic Factor Inhibits GABAergic Neurotransmission by Activating Endocytosis and Repression of GABA Receptors ", The Journal of Neuroscience, 2014 7 words — < 1%  
Crossref
- 
- 91 Guiping Xu, Yang Wang, Zhe Chen, Yuxuan Zhang, Xuexue Zhang, Guichao Zhang. "Esketamine improves propofol-induced brain injury and cognitive impairment in rats", Translational Neuroscience, 2022 7 words — < 1%  
Crossref
- 
- 92 Hewitt, Danielle. "Neural Changes Associated with Spinal Cord and External Peripheral Nerve Stimulation for the Treatment of Neuropathic Lower Limb Pain", The University of Liverpool (United Kingdom), 2023 7 words — < 1%  
ProQuest
- 
- 93 Ian Coulter, Tamara Timic Stamenic, Pierce Eggan, Brier R. Fine et al. "Different roles of T-type calcium 7 words — < 1%

channel isoforms in hypnosis induced by an endogenous neurosteroid epipregnanolone", Neuropharmacology, 2021

Crossref

---

94 Kok, Morgan. "A Molecular and Computational Approach to Analyze the Biogenesis of the Potassium-Chloride Cotransporter 2 (KCC2), A Neuron-Specific Protein Implicated in Disease", University of Pittsburgh

7 words — < 1%

ProQuest

---

95 Nan Wang, Mingyu Wang. "Dexmedetomidine suppresses sevoflurane anesthesia-induced neuroinflammation through activation of the PI3K/Akt/mTOR pathway", BMC Anesthesiology, 2019

7 words — < 1%

Crossref

---

96 Refik Servi, Ramazan Fazıl Akkoç, Feyza Aksu, Süleyman Servi. "Therapeutic potential of enzymes, neurosteroids, and synthetic steroids in neurodegenerative disorders: A critical review", The Journal of Steroid Biochemistry and Molecular Biology, 2025

7 words — < 1%

Crossref

---

97 Stephanie L. Merhar, Carla M. Bann, Nicole Mack, Jamie E. Newman et al. "Prenatal Opioid Exposure is Associated with Punctate White Matter Lesions in Term Newborns", The Journal of Pediatrics, 2025

7 words — < 1%

Crossref

---

98 "Fundamentals of Pediatric Neuroanesthesia", Springer Science and Business Media LLC, 2021

6 words — < 1%

Crossref

---

99 "Total Intravenous Anesthesia and Target Controlled Infusions", Springer Science and Business Media LLC, 2017

6 words — < 1%

Crossref

100 A. Leslie Morrow, Giorgia Boero, Irina Balan. "Emerging Evidence for Endogenous Neurosteroid Modulation of Pro-Inflammatory and Anti-Inflammatory Pathways that Impact Neuropsychiatric Disease", Neuroscience & Biobehavioral Reviews, 2024

6 words — < 1%

Crossref

101 Hostetler, Rachel Elaine. "The Diversity and Synaptic Connectivity of Somatostatin-containing Inhibitory Interneurons in the Somatosensory (Barrel) Cortex", West Virginia University, 2024

6 words — < 1%

ProQuest

102 Jiaxi Qian, Maorong Jiang, Zihan Ding, Dandan Gu, Huiyuan Bai, Min Cai, Dengbing Yao. "Role of Long Non-coding RNA in Nerve Regeneration", International Journal of Neuroscience, 2023

6 words — < 1%

Crossref

103 Ryan A. Stevens, Brandon D. Butler, Saurabh S. Kokane, Andrew W. Womack, Qing Lin. "Neonatal inhibition of Na<sup>+</sup> -K<sup>+</sup> -2Cl<sup>-</sup> -cotransporter prevents ketamine induced spatial learning and memory impairments", Neurotoxicology and Teratology, 2017

6 words — < 1%

Crossref

104 Wanping Gu, Tingting Pan, Xuedong Wang, Liheng Kang, Nan Liu, Meihua Piao, Chunsheng Feng. "Sevoflurane exposure triggers ferroptosis of neuronal cells initiated by the activation of ATM/p53 in the neonatal brain via JNK/p38 MAPK-mediated oxidative DNA damage", Springer Science and Business Media LLC, 2024

6 words — < 1%

Crossref Posted Content

105 X. Zhang, F. Liu, W. Slikker, C. Wang, M.G. Paule. "Minimally invasive biomarkers of general

6 words — < 1%

anesthetic-induced developmental neurotoxicity",  
Neurotoxicology and Teratology, 2017

Crossref

---

|                      |    |                 |     |
|----------------------|----|-----------------|-----|
| EXCLUDE QUOTES       | ON | EXCLUDE SOURCES | OFF |
| EXCLUDE BIBLIOGRAPHY | ON | EXCLUDE MATCHES | OFF |
